# Supplementary material for: The trends and the risk of type 1 diabetes over the past 40 years: an analysis by birth cohorts and by parental migration background in Sweden
Source: PubMed Central journal article supplement — BMJ Open. 2013 Oct 31;3(10):e003418. doi: 10.1136/bmjopen-2013-003418 (PMC3816233; doi:10.1136/bmjopen-2013-003418), 2013-10-31
Supplement: bmjopen-2013-003418.draft_revisions.pdf [file bmjopen-2013-003418.draft_revisions.pdf]

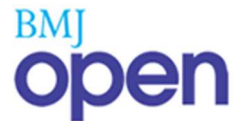

**The trends and the risk of type 1 diabetes over the past 40 years: an analysis by birth cohorts and by parental migration background in Sweden**

|                                 |                                                                                                                                                                                                                                                                                                                                                                                               |
|---------------------------------|-----------------------------------------------------------------------------------------------------------------------------------------------------------------------------------------------------------------------------------------------------------------------------------------------------------------------------------------------------------------------------------------------|
| Journal:                        | <i>BMJ Open</i>                                                                                                                                                                                                                                                                                                                                                                               |
| Manuscript ID:                  | bmjopen-2013-003418                                                                                                                                                                                                                                                                                                                                                                           |
| Article Type:                   | Research                                                                                                                                                                                                                                                                                                                                                                                      |
| Date Submitted by the Author:   | 19-Jun-2013                                                                                                                                                                                                                                                                                                                                                                                   |
| Complete List of Authors:       | Hussen, Hozan; Karolinska Institutet, Department of Environmental Medicine, Division of Epidemiology, Unit of Cardiovascular Epidemiology Persson, Martina; Karolinska University Hospital, Department of Medicine, Clinical Epidemiology Unit<br>Moradi, Tahereh; Karolinska Institutet, Department of Environmental Medicine, Division of Epidemiology, Unit of Cardiovascular Epidemiology |
| <b>Primary Subject Heading</b>: | Diabetes and endocrinology                                                                                                                                                                                                                                                                                                                                                                    |
| Secondary Subject Heading:      | Epidemiology                                                                                                                                                                                                                                                                                                                                                                                  |
| Keywords:                       | Type 1 Diabetes, Birth Cohort, Incidence, Migration, Sweden                                                                                                                                                                                                                                                                                                                                   |
|                                 |                                                                                                                                                                                                                                                                                                                                                                                               |

SCHOLARONE™  
Manuscripts

1  
2  
3 **The trends and the risk of type 1 diabetes over the past 40 years: an analysis**  
4 **by birth cohorts and by parental migration background in Sweden**  
5  
6  
7  
8

9 Hozan Ismael Hussen<sup>\*1</sup>, Martina Persson<sup>2</sup>, Tahereh Moradi<sup>1,3</sup>  
10  
11

12  
13  
14 <sup>1</sup>Department of Environmental Medicine, Division of Epidemiology, Unit of  
15 Cardiovascular Epidemiology, Karolinska Institutet, Stockholm, Sweden.  
16  
17

18 <sup>2</sup>Department of Medicine, Clinical Epidemiology Unit, Karolinska University Hospital,  
19 Stockholm, Sweden.  
20  
21

22 <sup>3</sup>Centre for Epidemiology and Social Medicine, Health Care Services, Stockholm  
23 County Council, Sweden  
24  
25  
26  
27

28  
29 **\*Corresponding author:**  
30

31 Hozan Ismael Hussen, MD  
32

33 Department of Environmental Medicine, Division of Epidemiology,  
34

35 Unit of Cardiovascular Epidemiology, Karolinska Institutet  
36  
37

38 Nobels väg 13, Box 210,  
39

40 SE-171 77 Stockholm, Sweden  
41

42 Phone: +46-8-524 800 55  
43

44 Fax: +46-8-31 39 36  
45

46 E-mail: hozan.hussen@ki.se  
47  
48  
49

50  
51 **Word count**  
52

53 Main text 3079  
54  
55  
56  
57  
58  
59  
60

## ABSTRACT

**Objective:** To investigate the trends and the risk of developing type 1 diabetes in offspring of Swedes and immigrants by specific parental migration background, age, sex and birth cohort.

**Design:** Registry-based cohort study.

**Setting:** Using Swedish nation-wide data we analyzed the risk of developing type 1 diabetes in 3,457,486 female and 3,641,304 male offspring between 0-30 years of age, born to native Swedes or immigrants, and born and living in Sweden between 1969 and 2009. We estimated Incidence rate ratios (IRRs) with 95% confidence intervals using Poisson regression models. We further calculated age-standardized rates (ASRs) of type 1 diabetes, using the world population as standard.

**Results:** We observed a trend of increasing ASRs among offspring below 15 years of age born to native Swedes but not among offspring of immigrants. We further observed a shift towards younger age at diagnosis in younger birth cohorts in both groups of offspring.

Compared with offspring of Swedes, children (0 to 14 years) and young adults (15 to 30 years) with one parent born abroad had an overall 30% and 15% to 20% lower IRR, respectively, after multivariable adjustment. The reduction in IRR was even greater among offspring of immigrants if both parents were born abroad. Analysis by specific parental region of birth revealed a 45% to 60% higher IRR among male and female offspring aged 0–30 years of Eastern Africa.

**Conclusions:** Parental country of birth and early exposures to environmental factors play an important role in the etiology of type 1 diabetes.

### Key words

Type 1 Diabetes, Birth Cohort, Incidence, Migration, Sweden

## Article summary

### Article focus

- The primary aim of the present study was to investigate if the risk of type 1 diabetes differs between offspring of Swedes and offspring of foreign born parents assuming that offspring of foreign born parents have similar environmental exposures as offspring of Swedes.
- The secondary aim was to investigate if age at onset of type 1 diabetes varies with ethnic background and between birth cohorts.

### Key messages

- The observed increasing trend of type 1 diabetes and shift towards younger age at diagnosis in individuals younger than 15 years of age, suggests an important role of early exposures to environmental factors for the etiology of type 1 diabetes.
- The reduced Incidence rate ratio (IRR) among children (0 to 14 years) and young adults (15 to 30 years) with one foreign born parent, and even greater reduction if both parents were born abroad, also indicate the importance of parental country of birth in the etiology of type 1 diabetes.

### Strengths and limitation of this study

- Study strengths include the nation-wide cohort design, nearly complete follow-up of type 1 diabetes occurrence over 40 years and avoiding misclassification bias through using unique Personal Identification Number (PIN) assigned to all Swedish citizens.
- A limitation with our study is the lack of specific ICD codes for type 1 diabetes in the earlier versions of ICD (i.e. 8th and 9th version of ICD). However, the prevalence of T2DM is low in Sweden and most likely the majority of diabetes cases diagnosed before 30 years of age are coded as type 1 diabetes.

## INTRODUCTION

The epidemic of type 1 diabetes is accelerating in many parts of the world with large impact on the affected individual's life and also with great health economic consequences [1]. There is a wide variation in the incidence of type 1 diabetes between countries, ranging from 0.1 per 100 000 person years in China and Venezuela to more than 40 per 100 000 person years in Sweden and Finland, respectively [2-4].

The concordance rate of type 1 diabetes among monozygotic twins has been estimated to 27% [5]. Thus, in the etiology of type 1 diabetes, there is considerable room for influence of environmental factors acting on genetic predisposition. Investigating the occurrence of type 1 diabetes in immigrants and their offspring offers a unique possibility to explore and delineate the gene-environment interaction for the development of type 1 diabetes.

Over the past decades, a rapid rise in the incidence of type 1 diabetes among individuals below 15 years of age has been reported and also with a shift towards younger age at onset [6, 7]. These studies, however, have not distinguished between individuals born to parents with different migration background. If offspring of immigrants, with varying genetic background, experience the same change in age at onset as observed in offspring of natives, the importance of early environmental exposures for the development of type 1 diabetes would be further supported. We recently reported a decreased risk of type 1 diabetes among the majority of immigrants in Sweden compared with native Swedes. We also observed a tendency towards a convergence of risks for type 1 diabetes between offspring of immigrants as one group and native Swedes [8]. Since immigrants and their offspring are a

1  
2  
3 heterogeneous population, there is a need to explore if the risk of type 1 diabetes  
4 varies by specific parental country or region of birth.  
5  
6

7 In the present study, we used Swedish nation-wide data collected over 40 years to  
8 investigate the trend and the risk of developing type 1 diabetes in offspring of  
9 immigrants by specific paternal and maternal migration background and by birth  
10 cohorts. Since the incidence of type 1 diabetes varies with sex and age [9, 10], the  
11 analyses were stratified by offspring sex and age.  
12  
13  
14  
15  
16  
17  
18  
19

## 20 **METHODS**

### 21 *Database*

22 We used information from a newly established, nationwide dataset – The Migration  
23 and Health Cohort (M&H Co.) [11], where data from national, longitudinal clinical,  
24 health and socio - demographic registries have been compiled. This database was  
25 built by individual record-linkage between more than fifteen Swedish national  
26 registries to facilitate studies on diabetes, injuries, cancer, cardiovascular and  
27 psychiatric diseases among immigrants and their descendants in Sweden. The  
28 linkage was done using the Personal Identification Number (PIN), which is uniquely  
29 assigned to each individual that have resided in Sweden for longer than one year  
30 since 1947 [12]. The data used in this study are part of the M&H Co., including: 1)  
31 The Swedish Total Population Register, which covers the entire population  
32 registration in Sweden and is updated on a daily basis. The registry contains  
33 information on demographic variables, such as date and place of birth and data on  
34 emigration and immigration [13]. 2) The Cause of Death Register, which contains  
35 information on the date of death, the main and contributing causes of death [14]. 3)  
36 The National Patient Register, including the Inpatient Register which was established  
37  
38  
39  
40  
41  
42  
43  
44  
45  
46  
47  
48  
49  
50  
51  
52  
53  
54  
55  
56  
57  
58  
59  
60

1  
2  
3 in 1964 and with national coverage since 1987. Since 2001, the Patient Register  
4 includes information on all outpatient visits to specialist care and day visits to  
5 hospitals. The Patient Register contains data on the main diagnosis and up to eight  
6 secondary diagnoses [15, 16]. 4) The Multi-Generation Register contains links  
7 between children and their parents via PINs for all Swedish inhabitants born after  
8 1931 who were alive in 1960 [17]. 5) The National Population and Housing Censuses  
9 and longitudinal integration database for health insurance and labor market studies  
10 (LISA), contains data on socio-economic, occupational and demographic variables  
11 [18, 19].

12  
13  
14 The linkages between the registers have been completed by Statistics Sweden and  
15 the National Board of Health and Welfare. To ensure confidentiality, the PINs have  
16 been replaced by person-unique serial numbers and a key code is kept at Statistics  
17 Sweden. The study was approved by one of the Regional Ethical Committees in  
18 Stockholm, Sweden (Dnr. 2009/2033-32).

### 19 20 21 22 23 24 25 26 27 28 29 30 31 32 33 34 35 36 37 38 39 40 41 42 43 44 45 46 47 48 49 50 51 52 53 54 55 56 57 58 59 60

*Study cohort*

The study population comprised 3,794,477 (51.4%) males and 3,593,765 (48.6%)  
females between 0 to 30 years of age, born and living in Sweden any time between  
January 1<sup>st</sup>, 1969 and December 31<sup>st</sup>, 2009. We excluded individuals whose parents  
had unknown information on country of birth and all individuals who had a history of  
type 1 diabetes, before entry into the cohort. The final cohort included 7,098,790  
individuals (3,641,304 (51.3%) males and 3,457,486 (48.7%) females) aged 0-30  
years and born in Sweden.

### *Follow-up*

The cohort members were followed from date of birth or January 1<sup>st</sup>, 1969, whichever occurred last, until the date of diagnosis of type 1 diabetes according to the Swedish versions of International Classification of Disease (ICD-8: 250, 1969-1986; ICD-9: 250, 1987-1996; ICD-10: E10, 1997 and onwards), emigration, death or end of follow-up (December 31<sup>st</sup>, 2009), whichever occurred first.

### *Classification of offspring based on parental country of birth*

The cohort was divided into four groups according to parental country of birth: individuals with mothers born outside Sweden (father could be born in Sweden, abroad or unknown) (n= 345,827); individuals with fathers born outside Sweden (mother could be born in Sweden, abroad or unknown) (n= 317,397); individuals with both parents born outside of Sweden (n= 435,045) and individuals with both parents born in Sweden (n= 6,000,521). We also classified parental country of birth into 6 continents: Africa (North, South, East, West and Middle Africa), Asia (East, West, South-Central, and South-East Asia), Europe (North, South, East, and West Europe), Latin America (Caribbean, Central America and South America) Northern America, and Oceania (Australia/New Zealand, Melanesia, and Micronesia/Polynesia). Based on the findings from our previous study among immigrant individuals [8], we categorized Africa into North, East and West Africa; Europe into Finland, North Europe without Finland, and South-, East-, and West Europe (the latter three as one group).

For the trend and the birth cohort analyses, we pooled all offspring of immigrants into one group.



### *Statistical analysis*

We estimated Incidence rate ratios (IRRs) with 95% confidence intervals (CIs) using Poisson regression models. The analyses were adjusted for age at follow-up (in 5 years intervals 0-4, 5-9, 10-14, 15-19, 20-24, and 25-30 years), calendar years of follow-up (four categories: 1969-1978, 1979-1988, 1989-1998 and 1999-2009) and education of the mother or father (classified into four levels: 0-9 years, 10-12 years, 13 years or more and unknown). All analyses were performed for females and males separately. In addition, analyses were made separately for children (0-14 years) and young adults (15-30 years) where we did not distinguish specific parental region or country of birth. In further analyses, children and young adults (0-30 years) were pooled together as one category to allow reasonable statistical power for analyses by specific maternal and paternal regions or country of birth to test the hypothesis if the mother's and the father's background affect the offspring's risk of type 1 diabetes differently. We also analyzed risk of type 1 diabetes in children with both mother and father born in the same country/region. Those with parents from different regions or from Sweden were categorized as a mixed group.

Since we had no specific ICD codes before 1997 to distinguish between type 1 and type 2 diabetes, we repeated the analysis and confined our cohort to individuals living in Sweden between 1997 and 2009 where we could strictly identify type 1 diabetes according to ICD-10. The results were similar to the results of the entire cohort and thus not presented.

For the trend analysis, we further calculated age-standardized rates (ASRs), using the world population as standard [20]. We reported ASR in unit of per 100,000 person years.

We used Statistical Analysis System (SAS) version 9.3 for all the analysis.

## RESULTS

On average, the age of onset of type 1 diabetes was similar in offspring of immigrants as in offspring of Swedes (mean  $\pm$  SD; offspring of immigrants  $14.31 \pm 7.70$ , offspring of swedes  $15.47 \pm 7.99$ ).

Over the study period (1969 -2009), we observed a clear trend of increasing incidence of type 1 diabetes among offspring below 15 years of age born to native Swedes whereas, the increase was less evident among offspring of immigrants (Figure 1). In contrast, no increase or a slight decreasing trend was observed among young individuals between 15 to 30 years of age regardless of parental migration background (Figure 2).

The birth cohort analysis revealed a shift towards lower age at onset in individuals below 15 years of age in both offspring of Swedes and in offspring of immigrants (Figures 3A and 3B).

Compared with offspring of Swedish-born parents, boys and girls (0 to 14 years) with a foreign-born mother or father had about 30% lower IRR in the multivariable analyses adjusted for age, calendar period and parental education. Among boys and girls with both parents born abroad, corresponding risk reductions were about a 40% (Table 1).

Compared with young adults (15 to 30 years) of Swedish-born parents, young adults with only one parent born abroad had about 15% to 20% lower IRR of type 1 diabetes and among young adults with both parents born abroad, the risks were reduced by 25% to 30% (Table 1).

Next, we investigated risks of type 1 diabetes by parental region of birth. Compared with young offspring (0-30 years) of Swedish-born parents, male and female offspring of mothers or fathers born in Africa had about 20% to 40% higher IRR of type 1

1  
2  
3 diabetes (Table 2). The increased risk of type 1 diabetes was more prominent among  
4 individuals whose mothers or fathers were born in Eastern Africa. With a few  
5 exceptions, male and female offspring of mothers or fathers born in Asia, Europe  
6 (except Northern Europe), Latin America and Northern America (except female  
7 offspring to fathers from Northern America) had between 35% to 65% lower IRR than  
8 male and female offspring of Swedish-born parents (Table 2). These reductions in  
9 risks became even more prominent when we confined the analyses to parents born  
10 in the same region (Table 2). Offspring of Finnish immigrants and rest of Northern  
11 Europe had almost similar risks compared with offspring of Swedes (Table 2).  
12  
13  
14  
15  
16  
17  
18  
19  
20  
21  
22  
23  
24

## 25 **DISCUSSION**

26  
27 In this nation-wide cohort study of Sweden-born children and young adults, we  
28 observed a continuing increase of type 1 diabetes in individuals younger than 15  
29 years of age over the past decades. This increase was, however, less evident among  
30 offspring of immigrants than in offspring of native Swedes. In contrast, no change in  
31 trend was observed among young individuals between 15 to 30 years of age, and  
32 regardless of parental country of birth.  
33  
34  
35  
36  
37  
38  
39

40 An interesting finding in the present study was an almost identical pattern with a shift  
41 towards lower age at onset of type 1 diabetes by younger birth cohorts in both  
42 offspring of foreign born parents and Swedes.  
43  
44  
45  
46

47 Over the past decades, a rapid rise in the incidence of type 1 diabetes has been  
48 demonstrated [21, 22]. The finding of an increased incidence rate of type 1 diabetes  
49 between 1969 and 2009 among individuals below 15 years of age, and a decreasing  
50 or steady incidence rate among young adults, is in line with previous studies from  
51 Sweden [6] and other parts of the world [7]. The finding of an almost identical pattern  
52  
53  
54  
55  
56  
57  
58  
59  
60

1  
2  
3 with a shift towards lower age at onset of type 1 diabetes in both offspring of foreign  
4 born parents and Swedes indicates the exposure to similar environmental factors in  
5 both groups. It has been hypothesized that this developments is due to increased  
6 exposures in early life to factors that initiate and/ or accelerate beta cell destruction,  
7 including viral infections, rapid postnatal growth and nutritional factors [23, 24].  
8

9  
10 We further found that offspring with one or two parents born abroad had a reduced  
11 risk of type 1 diabetes compared with offspring to Sweden-born parents. The  
12 reduction in risk was similar between sexes and was more apparent among  
13 individuals where both parents were foreign born. Stratification by specific parental  
14 region/country of birth, however, revealed that this reduction was confined to  
15 offspring of immigrants from Asia, Latin and North America, South-, West- and East  
16 Europe. In contrast, the IRR for type 1 diabetes was increased in individuals with  
17 African parents, particularly so if the parents were born in Eastern or Northern Africa.  
18 The primary strength of our study is the nation-wide cohort design with nearly  
19 complete follow-up of type 1 diabetes occurrence over several decades. Using a  
20 unique PIN assigned to all Swedish citizens, we were able to correctly assess  
21 exposure (parental country of birth) and thus avoiding misclassification bias.  
22

23  
24 The observed increased risk among offspring of Africans in this study is also  
25 observed in Swedish residents born in Africa [8, 25]. It is unclear if these findings  
26 reflect a high risk of type 1 diabetes in the countries of origin, thus rating Eastern and  
27 Northern Africa as the areas with the highest incidence of type 1 diabetes in the  
28 world.  
29

30  
31 The reported low number of type 1 diabetes diagnoses in Africa [26] is most likely to  
32 be underestimated due to lack of diagnostic measures [27], and high mortality  
33 among uncontrolled type 1 diabetes cases as a result of limited access to insulin  
34  
35  
36  
37  
38  
39  
40  
41  
42  
43  
44  
45  
46  
47  
48  
49  
50

1  
2  
3 treatment [28]. Moreover, priorities are mostly given to the high burden of  
4  
5 communicable diseases in African countries [29], especially in busy emergency  
6  
7 hospitals. As a consequence, children with diabetic ketoacidosis at the time of  
8  
9 diagnosis [30] could be misdiagnosed as cerebral malaria or meningitis [31] which  
10  
11 would also lead to an underestimation of type 1 diabetes cases. The observed higher  
12  
13 risk in African offspring in the present study and the increased risk of type 1 diabetes  
14  
15 in Swedish residents born in Africa [8] might be due to genetic propensity interacting  
16  
17 with environmental factors in the new home country.  
18  
19

20  
21 Offspring of Swedish residents born in Asia, Latin and North America, South-, West-  
22  
23 and East Europe retained the low risk profile we recently observed in young  
24  
25 immigrants in Sweden born in these areas [8]. This risk reduction was independent of  
26  
27 maternal or paternal birth region but was stronger if both parents were born in the  
28  
29 same region.  
30

31  
32 The importance of parental country of birth for the risk of developing type 1 diabetes  
33  
34 has also been observed in other studies [32-35] and may indicate the role of genetic  
35  
36 factors [36, 37]. Children of Sardinian heritage (a high risk area), born and living in  
37  
38 Lazio (a low risk area) retained the high risk profile of Sardinia [38]. The risk for type  
39  
40 1 diabetes in children of Yugoslavian, Italian and Greek heritage in Germany was  
41  
42 closer to the reported incidence in those countries than in Germany [39] However,  
43  
44 the importance of life style or environmental factors interacting with genetic factors  
45  
46 cannot be ruled out [40] as studies of immigration from regions with low to high  
47  
48 incidence of type 1 diabetes have been associated with increased incidence of type 1  
49  
50 diabetes [33] .  
51  
52

53  
54 We lacked specific ICD codes for type 1 diabetes in the earlier versions of ICD (i.e.  
55  
56 8<sup>th</sup> and 9<sup>th</sup> version of ICD). However, the prevalence of type 2 diabetes is low in  
57  
58  
59  
60

1  
2  
3 Sweden [41, 42] and most likely the majority of cases of diabetes diagnosed before  
4  
5 30 years are type 1 diabetes. Moreover, the results of the analysis limited to only  
6  
7 cases of type 1 diabetes according to ICD 10 for the years 1997 and forward were  
8  
9 similar to the results for the entire period of the study.  
10

11  
12 Our findings of a lower IRR of type 1 diabetes among children and young adults with  
13  
14 one or two foreign born parents, with the notable exception of offspring of African  
15  
16 immigrants, and the shifting of age of diagnosis towards younger age in both  
17  
18 offspring of Swedes and of immigrants highlight the important role of environmental  
19  
20 factors and its interaction with genetic background in the etiology of type 1 diabetes.  
21

22  
23 Further studies of exploring early exposures to environmental factors and studies on  
24  
25 offspring of immigrants from African countries, in particular from Eastern Africa, might  
26  
27 improve our understanding on the etiology of the disease.  
28  
29  
30  
31  
32  
33  
34  
35  
36  
37  
38  
39  
40  
41  
42  
43  
44  
45  
46  
47  
48  
49  
50  
51  
52  
53  
54  
55  
56  
57  
58  
59  
60

## Acknowledgements

This work was supported by grants from The Ministry of Higher Education and Scientific Research-Kurdistan Regional Government/Iraq, and the Department of Environmental Medicine, Karolinska institutet, Stockholm, Sweden.

The authors thank Professor Sven Cnattingius, for his critical review of the manuscript.

The authors appreciate the help from Statistics Sweden and the National Board of Health and Welfare, which provided them with data

## Competing interests

No potential conflicts of interest relevant to this article were reported.

## Contributors

H.I.H. designed the research, drafted the manuscript, analyzed data, and interpreted results.

M.P. designed the research, interpreted the results critically reviewed and edited the manuscript.

T.M. designed the research, interpreted the results, critically reviewed and edited the manuscript, handled research data and funding, and supervised.

## Data Sharing

There are no additional data available.

## REFERENCES

1. Dabelea, D., *The accelerating epidemic of childhood diabetes*. Lancet, 2009. **373**(9680): p. 1999-2000.
2. Berhan, Y., et al., *Thirty years of prospective nationwide incidence of childhood type 1 diabetes: the accelerating increase by time tends to level off in Sweden*. Diabetes, 2011. **60**(2): p. 577-81.
3. Kondrashova, A., et al., *A six-fold gradient in the incidence of type 1 diabetes at the eastern border of Finland*. Ann Med, 2005. **37**(1): p. 67-72.
4. Pitkaniemi, J., et al., *Increasing incidence of Type 1 diabetes--role for genes?* BMC Genet, 2004. **5**: p. 5.
5. Hyttinen, V., et al., *Genetic liability of type 1 diabetes and the onset age among 22,650 young Finnish twin pairs: a nationwide follow-up study*. Diabetes, 2003. **52**(4): p. 1052-5.
6. Pundziute-Lycka, A., et al., *The incidence of Type I diabetes has not increased but shifted to a younger age at diagnosis in the 0-34 years group in Sweden 1983-1998*. Diabetologia, 2002. **45**(6): p. 783-91.
7. Weets, I., et al., *The incidence of type 1 diabetes in the age group 0-39 years has not increased in Antwerp (Belgium) between 1989 and 2000: evidence for earlier disease manifestation*. Diabetes Care, 2002. **25**(5): p. 840-6.
8. Hussen, H.I., et al., *Type I diabetes among children and young adults: the role of country of birth, socioeconomic position and sex*. Pediatr Diabetes, 2012.
9. Karvonen, M., et al., *Sex difference in the incidence of insulin-dependent diabetes mellitus: an analysis of the recent epidemiological data*. World Health Organization DIAMOND Project Group. Diabetes Metab Rev, 1997. **13**(4): p. 275-91.
10. Ostman, J., et al., *Gender differences and temporal variation in the incidence of type 1 diabetes: results of 8012 cases in the nationwide Diabetes Incidence Study in Sweden 1983-2002*. J Intern Med, 2008. **263**(4): p. 386-94.
11. Beiki, O., B. Stegmayr, and T. Moradi, *Country reports: Sweden*, in *Migration-sensitive Cancer Registration in Europe* O. Razum, et al., Editors. 2011, Lang p. 106-123.
12. Ludvigsson, J.F., et al., *The Swedish personal identity number: possibilities and pitfalls in healthcare and medical research*. Eur J Epidemiol, 2009. **24**(11): p. 659-67.
13. Johannesson, I., *The total population register of statistics Sweden. New possibilities and better quality*. Statistics Sweden: Örebro. 2002.
14. Socialstyrelsen, *Causes of death, The National Board of Health and Welfare, CENTRE FOR EPIDEMIOLOGY*. Official Statistics of Sweden, 2007.
15. Socialstyrelsen. *Kvalitet och innehåll i patientregistret*. 2009 [cited 2010 08-05]; Available from: [www.socialstyrelsen.se](http://www.socialstyrelsen.se), The National Board of Health and Welfare.
16. Ludvigsson, J.F., et al., *External review and validation of the Swedish national inpatient register*. BMC Public Health, 2011. **11**: p. 450.
17. *The Multi-Generation Registry. Bakgrundsfakta till befolknings-ochvålfärdsstatistik*. Statistiska Centralbyrån: Örebro; 2001.
18. Statistics\_Sweden. *Folk- och bostadsräkningar, FoB*. 2010 [cited 2010 02-25]; Available from: [www.scb.se](http://www.scb.se).
19. Socialstyrelsen. *Longitudinal integration database for health insurance and labour market studies (LISA by Swedish acronym)*. 2010 [cited 2010 08-10]; Available from: [www.socialstyrelsen.se](http://www.socialstyrelsen.se).
20. Omar B. Ahmad, C.B.-P., Alan D. Lopez, Christopher JL Murray, Rafael Lozano, Mie Inoue, *AGE STANDARDIZATION OF RATES: A NEW WHO STANDARD*. GPE Discussion Paper Series: No.31, EIP/GPE/EBD, World Health Organization 2001.



- 1
  - 2
  - 3
  - 4
  - 5
  - 6
  - 7
  - 8
  - 9
  - 10
  - 11
  - 12
  - 13
  - 14
  - 15
  - 16
  - 17
  - 18
  - 19
  - 20
  - 21
  - 22
  - 23
  - 24
  - 25
  - 26
  - 27
  - 28
  - 29
  - 30
  - 31
  - 32
  - 33
  - 34
  - 35
  - 36
  - 37
  - 38
  - 39
  - 40
  - 41
  - 42
  - 43
  - 44
  - 45
  - 46
  - 47
  - 48
  - 49
  - 50
  - 51
  - 52
  - 53
  - 54
  - 55
  - 56
  - 57
  - 58
  - 59
  - 60
21. Green, A. and C.C. Patterson, *Trends in the incidence of childhood-onset diabetes in Europe 1989-1998*. Diabetologia, 2001. **44 Suppl 3**: p. B3-8.
22. *Incidence and trends of childhood Type 1 diabetes worldwide 1990-1999*. Diabetic Medicine, 2006. **23**(8): p. 857-866.
23. Dahlquist, G., *Can we slow the rising incidence of childhood-onset autoimmune diabetes? The overload hypothesis*. Diabetologia, 2006. **49**(1): p. 20-4.
24. Haynes, A., et al., *Perinatal risk factors for childhood Type 1 diabetes in Western Australia--a population-based study (1980-2002)*. Diabet Med, 2007. **24**(5): p. 564-70.
25. Hjern, A., U. Soderstrom, and J. Aman, *East Africans in Sweden have a high risk for type 1 diabetes*. Diabetes Care, 2012. **35**(3): p. 597-8.
26. Karvonen, M., et al., *Incidence of childhood type 1 diabetes worldwide. Diabetes Mondiale (DiaMond) Project Group*. Diabetes Care, 2000. **23**(10): p. 1516-26.
27. Hall, V., et al., *Diabetes in Sub Saharan Africa 1999-2011: epidemiology and public health implications. A systematic review*. BMC Public Health, 2011. **11**: p. 564.
28. <http://www.idf.org/diabetesatlas/5e/africa>.
29. Majaliwa, E.S., et al., *Type 1 diabetes mellitus in the African population: epidemiology and management challenges*. Acta Biomed, 2008. **79**(3): p. 255-9.
30. Monabeka, H.G., A. Mbika-Cardorelle, and G. Moyon, *[Ketoacidosis in children and teenagers in Congo]*. Sante, 2003. **13**(3): p. 139-41.
31. Rwiza, H.T., A.B. Swai, and D.G. McLarty, *Failure to diagnose diabetic ketoacidosis in Tanzania*. Diabet Med, 1986. **3**(2): p. 181-3.
32. Hjern, A. and U. Soderstrom, *Parental country of birth is a major determinant of childhood type 1 diabetes in Sweden*. Pediatr Diabetes, 2008. **9**(1): p. 35-9.
33. Cataldo, F., *Early onset of Type 1 diabetes mellitus in immigrant children from developing countries to Western Europe: the role of environmental factors?* J Endocrinol Invest, 2005. **28**(6): p. 574-5.
34. Soderstrom, U., J. Aman, and A. Hjern, *Being born in Sweden increases the risk for type 1 diabetes - a study of migration of children to Sweden as a natural experiment*. Acta Paediatr, 2012. **101**(1): p. 73-7.
35. Podar, T., et al., *Risk of childhood type 1 diabetes for Russians in Estonia and Siberia*. Int J Epidemiol, 1993. **22**(2): p. 262-7.
36. Patrick, S.L., et al., *IDDM incidence in a multiracial population. The Hawaii IDDM Registry, 1980-1990*. Diabetes Care, 1997. **20**(6): p. 983-7.
37. Ji, J., et al., *Ethnic differences in incidence of type 1 diabetes among second-generation immigrants and adoptees from abroad*. J Clin Endocrinol Metab, 2010. **95**(2): p. 847-50.
38. Muntoni, S., et al., *Incidence of insulin-dependent diabetes mellitus among Sardinian-heritage children born in Lazio region, Italy*. Lancet, 1997. **349**(9046): p. 160-2.
39. Neu, A., et al., *Diabetes incidence in children of different nationalities: an epidemiological approach to the pathogenesis of diabetes*. Diabetologia, 2001. **44 Suppl 3**: p. B21-6.
40. Zung, A., et al., *Type 1 diabetes in Jewish Ethiopian immigrants in Israel: HLA class II immunogenetics and contribution of new environment*. Hum Immunol, 2004. **65**(12): p. 1463-8.
41. Arnqvist, H.J., et al., *Difficulties in classifying diabetes at presentation in the young adult*. Diabet Med, 1993. **10**(7): p. 606-13.
42. Lynch, K.F., et al., *Context and disease when disease risk is low: the case of type 1 diabetes in Sweden*. J Epidemiol Community Health, 2010. **64**(9): p. 789-95.

1  
2  
3  
4  
5  
6  
7  
8  
9  
10  
11  
12  
13  
14  
15  
16  
17  
18  
19  
20  
21  
22  
23  
24  
25  
26  
27  
28  
29  
30  
31  
32  
33  
34  
35  
36  
37  
38  
39  
40  
41  
42  
43  
44  
45  
46  
47  
48  
49  
50  
51  
52  
53  
54  
55  
56  
57  
58  
59  
60

Figures

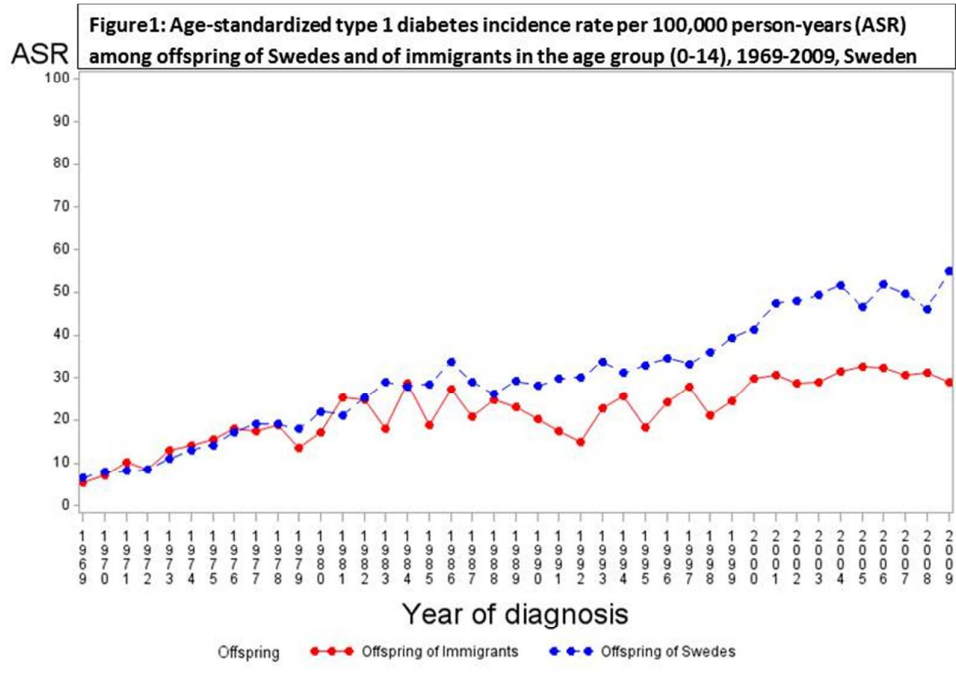

ew only

1  
2  
3  
4  
5  
6  
7  
8  
9  
10  
11  
12  
13  
14  
15  
16  
17  
18  
19  
20  
21  
22  
23  
24  
25  
26  
27  
28  
29  
30  
31  
32  
33  
34  
35  
36  
37  
38  
39  
40  
41  
42  
43  
44  
45  
46  
47  
48  
49  
50  
51  
52  
53  
54  
55  
56  
57  
58  
59  
60

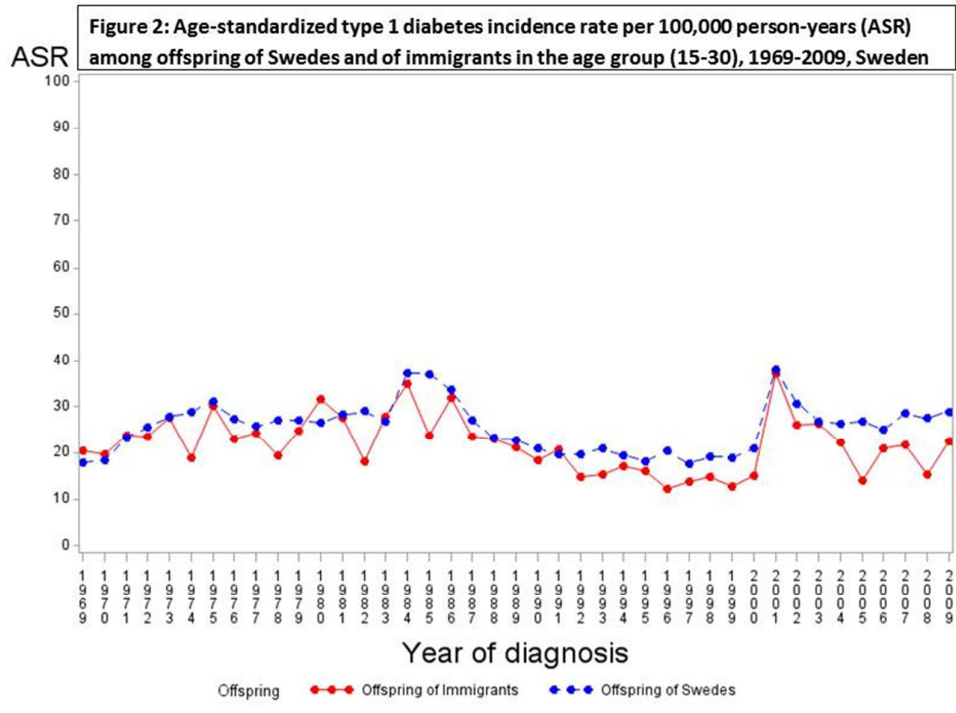

view only

1  
2  
3  
4  
5  
6  
7  
8  
9  
10  
11  
12  
13  
14  
15  
16  
17  
18  
19  
20  
21  
22  
23  
24  
25  
26  
27  
28  
29  
30  
31  
32  
33  
34  
35  
36  
37  
38  
39  
40  
41  
42  
43  
44  
45  
46  
47  
48  
49  
50  
51  
52  
53  
54  
55  
56  
57  
58  
59  
60

Figure 3.A. : Incidence of type 1 diabetes by age at diagnosis (0-30 years) and birth cohorts 1960-2009 among offspring of Swedes in Sweden

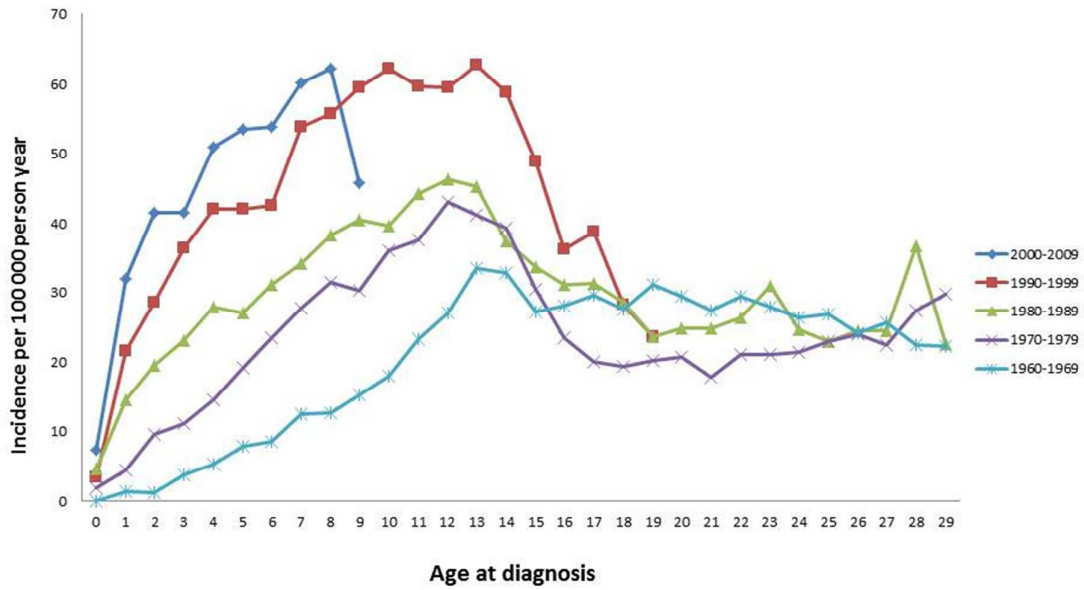

view only

1  
2  
3  
4  
5  
6  
7  
8  
9  
10  
11  
12  
13  
14  
15  
16  
17  
18  
19  
20  
21  
22  
23  
24  
25  
26  
27  
28  
29  
30  
31  
32  
33  
34  
35  
36  
37  
38  
39  
40  
41  
42  
43  
44  
45  
46  
47  
48  
49  
50  
51  
52  
53  
54  
55  
56  
57  
58  
59  
60

Figure 3.B: Incidence of type 1 diabetes by age at diagnosis (0-30 years) and birth cohorts 1960-2009 among offspring of Immigrants in Sweden

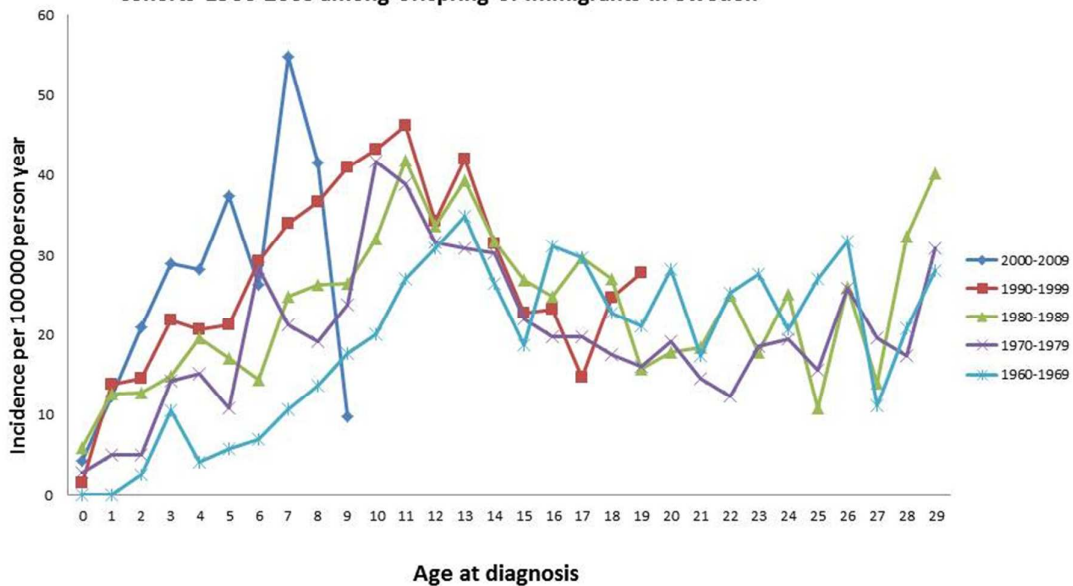

view only

**Table 1: Incidence rate ratio (IRR) and 95% confidence interval (CI) of type 1 diabetes among children aged (0-14) and young adults aged (15-30) by sex and parental country of birth, Sweden, 1969–2009.**

| Male (0-14)                 |       |          |                  |                  | Female (0-14)  |          |                  |                  |
|-----------------------------|-------|----------|------------------|------------------|----------------|----------|------------------|------------------|
| Parental immigration Status | Cases | PYRs     | IRR* (95% CI)    | IRR† (95% CI)    | Cases          | PYRs     | IRR* (95% CI)    | IRR† (95% CI)    |
| Mother foreign born         | 871   | 3810384  | 0.76 (0.71-0.81) | 0.69 (0.64-0.74) | 808            | 3610118  | 0.79 (0.73-0.85) | 0.71 (0.66-0.77) |
| Father foreign born         | 858   | 3948653  | 0.72 (0.67-0.77) | 0.65 (0.61-0.70) | 833            | 3764091  | 0.78 (0.73-0.84) | 0.70 (0.65-0.75) |
| Both parents foreign born   | 443   | 2249700  | 0.66 (0.60-0.73) | 0.58 (0.52-0.64) | 435            | 2134846  | 0.73 (0.66-0.80) | 0.62 (0.56-0.69) |
| Both parents born in Sweden | 8334  | 26670322 | 1                | 1                | 7417           | 25249558 | 1                | 1                |
| Male (15-30)                |       |          |                  |                  | Female (15-30) |          |                  |                  |
| Mother foreign born         | 624   | 2791560  | 0.82 (0.75-0.89) | 0.79 (0.73-0.86) | 510            | 2635294  | 0.82 (0.75-0.90) | 0.85 (0.77-0.93) |
| Father foreign born         | 618   | 2636310  | 0.86 (0.79-0.93) | 0.83 (0.76-0.90) | 442            | 2504279  | 0.75 (0.68-0.82) | 0.79 (0.72-0.87) |
| Both parents foreign born   | 270   | 1287893  | 0.76 (0.68-0.86) | 0.72 (0.64-0.82) | 204            | 1215563  | 0.71 (0.62-0.81) | 0.75 (0.65-0.86) |

Tables

1  
2  
3  
4  
5  
6  
7  
8  
9  
10  
11  
12  
13  
14  
15  
16  
17  
18  
19  
20  
21  
22  
23  
24  
25  
26  
27  
28  
29  
30  
31  
32  
33  
34  
35  
36  
37  
38  
39  
40  
41  
42  
43  
44  
45  
46  
47  
48  
49  
50  
51  
52  
53  
54  
55  
56  
57  
58  
59  
60

|                                                                                                                                  |      |          |   |   |      |          |   |   |
|----------------------------------------------------------------------------------------------------------------------------------|------|----------|---|---|------|----------|---|---|
| Both parents born in Sweden                                                                                                      | 8024 | 29689985 | 1 | 1 | 6627 | 28192526 | 1 | 1 |
| * Adjusted for age in five years categories.<br>† Mutually adjusted for age, parental education and calendar years of follow-up. |      |          |   |   |      |          |   |   |

For peer review only

**Table 2: Incidence rate ratio (IRR) and 95% confidence interval (CI) of type 1 diabetes among male and female ages 0-30 years by parental country of birth and sex Sweden, 1969-2009.**

| Parental country of birth    | IRR* (95 % CI) |                         |       |                         |       |                           |        |                         |       |                         |       |                           |
|------------------------------|----------------|-------------------------|-------|-------------------------|-------|---------------------------|--------|-------------------------|-------|-------------------------|-------|---------------------------|
|                              | Male           |                         |       |                         |       |                           | Female |                         |       |                         |       |                           |
|                              | cases          | Offspring of Mother     | cases | Offspring of Father     | Cases | Offspring of both Parents | cases  | Offspring of Mother     | cases | Offspring of Father     | Cases | Offspring of both Parents |
| Sweden                       | 16358          | 1                       | 16358 | 1                       | 16358 | 1                         | 14044  | 1                       | 14044 | 1                       | 14044 | 1                         |
| Africa                       | 92             | <b>1.42 (1.15-1.75)</b> | 148   | <b>1.19 (1.01-1.41)</b> | 78    | 1.12 (0.90-1.41)          | 86     | <b>1.33 (1.10-1.65)</b> | 129   | <b>1.33 (1.12-1.59)</b> | 75    | <b>1.32 (1.05-1.66)</b>   |
| Northern Africa              | 21             | 1.18 (0.77-1.81)        | 55    | 1.06 (0.81-1.40)        | 16    | 0.86 (0.53- 1.40)         | 26     | 1.27 (0.86-1.86)        | 50    | 1.18 (0.89-1.55)        | 19    | 1.25 (0.80- 1.96)         |
| Western Africa               | 4              | -                       | 17    | 0.89 (0.55-1.42)        | 2     | -                         | 5      | 0.76 (0.32-1.83)        | 12    | 0.99 (0.56-1.74)        | 4     | -                         |
| Eastern Africa               | 66             | <b>1.51 (1.18-1.92)</b> | 70    | <b>1.46 (1.15-1.85)</b> | 58    | <b>1.45 (1.12-1.88)</b>   | 51     | <b>1.47 (1.11-1.93)</b> | 62    | <b>1.61 (1.25-2.10)</b> | 47    | <b>1.44 (1.08-1.92)</b>   |
| Asia                         | 133            | <b>0.37 (0.31-0.44)</b> | 155   | <b>0.40 (0.34-0.47)</b> | 107   | <b>0.36 (0.30-0.44)</b>   | 137    | <b>0.48 (0.40-0.56)</b> | 155   | <b>0.49 (0.42-0.57)</b> | 108   | <b>0.45 (0.37-0.54)</b>   |
| Europe                       |                |                         |       |                         |       |                           |        |                         |       |                         |       |                           |
| Finland                      | 692            | 0.98 (0.91-1.10)        | 523   | 0.99 (0.90-1.08)        | 273   | 0.96 (0.85-1.08)          | 587    | 0.96 (0.89-1.05)        | 442   | 0.97 (0.88-1.06)        | 232   | 0.93 (0.82-1.06)          |
| North Europe (excl. Finland) | 240            | 0.88 (0.77-1.00)        | 258   | 0.89 (0.78-1.00)        | 46    | 0.89 (0.67-1.19)          | 235    | 0.99 (0.87-1.12)        | 231   | 0.91 (0.80-1.04)        | 38    | 0.82 (0.60-1.13)          |
| S.E.W. Europe†               | 284            | <b>0.55 (0.49-0.62)</b> | 319   | <b>0.53 (0.47-0.59)</b> | 110   | <b>0.39 (0.33-0.47)</b>   | 227    | <b>0.53 (0.46-0.60)</b> | 264   | <b>0.52 (0.46-0.58)</b> | 95    | <b>0.41 (0.33-0.50)</b>   |
| Latin America                | 39             | <b>0.56 (0.41-0.77)</b> | 51    | <b>0.65 (0.49-0.87)</b> | 17    | <b>0.39 (0.24-0.63)</b>   | 29     | <b>0.51 (0.35-0.75)</b> | 23    | <b>0.33 (0.21-0.51)</b> | 14    | <b>0.41 (0.24-0.69)</b>   |
| North America                | 13             | <b>0.50 (0.29-0.86)</b> | 20    | <b>0.55 (0.36-0.86)</b> | 0     | -                         | 15     | 0.78 (0.47-1.30)        | 31    | 1.02 (0.72-1.46)        | 0     | -                         |
| Oceania                      | 2              | -                       | 2     | -                       | 0     | -                         | 2      | -                       | 0     | -                       | 0     | -                         |
| Mixed‡                       | 0              | -                       | 0     | -                       | 84    | <b>0.64 (0.52-0.79)</b>   | 0      | -                       | 0     | -                       | 82    | <b>0.75 (0.61-0.94)</b>   |

\* Adjusted for age, parental education and calendar years of follow-up.

† South, East and West Europe

‡ Both parents are not from the same country or region.

IRR significantly different from 1 are bolded.



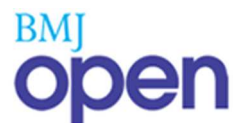

**The trends and the risk of type 1 diabetes over the past 40 years: an analysis by birth cohorts and by parental migration background in Sweden**

|                                 |                                                                                                                                                                                                                                                                                                                                                                                               |
|---------------------------------|-----------------------------------------------------------------------------------------------------------------------------------------------------------------------------------------------------------------------------------------------------------------------------------------------------------------------------------------------------------------------------------------------|
| Journal:                        | <i>BMJ Open</i>                                                                                                                                                                                                                                                                                                                                                                               |
| Manuscript ID:                  | bmjopen-2013-003418.R1                                                                                                                                                                                                                                                                                                                                                                        |
| Article Type:                   | Research                                                                                                                                                                                                                                                                                                                                                                                      |
| Date Submitted by the Author:   | 05-Sep-2013                                                                                                                                                                                                                                                                                                                                                                                   |
| Complete List of Authors:       | Hussen, Hozan; Karolinska Institutet, Department of Environmental Medicine, Division of Epidemiology, Unit of Cardiovascular Epidemiology Persson, Martina; Karolinska University Hospital, Department of Medicine, Clinical Epidemiology Unit<br>Moradi, Tahereh; Karolinska Institutet, Department of Environmental Medicine, Division of Epidemiology, Unit of Cardiovascular Epidemiology |
| <b>Primary Subject Heading</b>: | Diabetes and endocrinology                                                                                                                                                                                                                                                                                                                                                                    |
| Secondary Subject Heading:      | Epidemiology                                                                                                                                                                                                                                                                                                                                                                                  |
| Keywords:                       | Type 1 diabetes, Birth Cohort, Incidence, Migration, Sweden                                                                                                                                                                                                                                                                                                                                   |
|                                 |                                                                                                                                                                                                                                                                                                                                                                                               |

SCHOLARONE™  
Manuscripts

1  
2  
3 **The trends and the risk of type 1 diabetes over the past 40 years: an analysis**  
4 **by birth cohorts and by parental migration background in Sweden**  
5  
6  
7  
8

9 Hozan Ismael Hussen<sup>\*1</sup>, Martina Persson<sup>2</sup>, Tahereh Moradi<sup>1,3</sup>  
10  
11

12  
13  
14 <sup>1</sup>Department of Environmental Medicine, Division of Epidemiology, Unit of  
15 Cardiovascular Epidemiology, Karolinska Institutet, Stockholm, Sweden.  
16  
17

18 <sup>2</sup>Department of Medicine, Clinical Epidemiology Unit, Karolinska University Hospital,  
19 Stockholm, Sweden.  
20  
21

22 <sup>3</sup>Centre for Epidemiology and Social Medicine, Health Care Services, Stockholm  
23 County Council, Sweden  
24  
25  
26  
27

28  
29 **\*Corresponding author:**  
30

31 Hozan Ismael Hussen, MD  
32

33 Department of Environmental Medicine, Division of Epidemiology,  
34

35 Unit of Cardiovascular Epidemiology, Karolinska Institutet  
36  
37

38 Nobels väg 13, Box 210,  
39

40 SE-171 77 Stockholm, Sweden  
41

42 Phone: +46-8-524 800 55  
43

44 Fax: +46-8-31 39 36  
45

46 E-mail: hozan.hussen@ki.se  
47  
48  
49

50  
51 **Word count**  
52

53 Main text 3737  
54  
55  
56  
57  
58  
59  
60

## ABSTRACT

**Objective:** To investigate the trends and the risk of developing type 1 diabetes in offspring of Swedes and immigrants by specific parental migration background, age, sex and birth cohort.

**Design:** Registry-based cohort study.

**Setting:** Using Swedish nation-wide data we analyzed the risk of developing type 1 diabetes in 3,457,486 female and 3,641,304 male offspring between 0-30 years of age, born to native Swedes or immigrants, and born and living in Sweden between 1969 and 2009. We estimated Incidence rate ratios (IRRs) with 95% confidence intervals using Poisson regression models. We further calculated age-standardized rates (ASRs) of type 1 diabetes, using the world population as standard.

**Results:** We observed a trend of increasing ASRs among offspring below 15 years of age born to native Swedes and a less evident increase among offspring of immigrants. We further observed a shift towards younger age at diagnosis in younger birth cohorts in both groups of offspring.

Compared with offspring of Swedes, children (0 to 14 years) and young adults (15 to 30 years) with one parent born abroad had an overall 30% and 15% to 20% lower IRR, respectively, after multivariable adjustment. The reduction in IRR was even greater among offspring of immigrants if both parents were born abroad. Analysis by specific parental region of birth revealed a 45% to 60% higher IRR among male and female offspring aged 0–30 years of Eastern Africa.

**Conclusions:** Parental country of birth and early exposures to environmental factors play an important role in the etiology of type 1 diabetes.

### Key words

Type 1 diabetes, Birth Cohort, Incidence, Migration, Sweden

## Article summary

### Article focus

- The primary aim of the present study was to investigate if the risk of type 1 diabetes differs between offspring of Swedes and offspring of foreign born parents assuming that offspring of foreign born parents have similar environmental exposures as offspring of Swedes.
- The secondary aim was to investigate if age at onset of type 1 diabetes varies with ethnic background and between birth cohorts.

### Key messages

- The observed increasing trend of type 1 diabetes and shift towards younger age at diagnosis in individuals younger than 15 years of age, suggests an important role of early exposures to environmental factors for the etiology of type 1 diabetes.
- The reduced Incidence rate ratio (IRR) among children (0 to 14 years) and young adults (15 to 30 years) with one foreign born parent, and even greater reduction if both parents were born abroad, also indicate the importance of parental country of birth in the etiology of type 1 diabetes.

### Strengths and limitation of this study

- Study strengths include the nation-wide cohort design, nearly complete follow-up of type 1 diabetes occurrence over 40 years and avoiding misclassification bias through using unique Personal Identification Number (PIN) assigned to all Swedish citizens.
- A limitation with our study is the lack of specific ICD codes for type 1 diabetes in the earlier versions of ICD (i.e. 8th and 9th version of ICD). However, the prevalence of T2DM is low in Sweden and most likely the majority of diabetes cases diagnosed before 30 years of age are coded as type 1 diabetes.

## INTRODUCTION

The epidemic of type 1 diabetes is accelerating in many parts of the world with large impact on the affected individual's life and also with great health economic consequences [1]. There is a wide variation in the incidence of type 1 diabetes between countries, ranging from 0.1 per 100 000 person years in China and

1  
2  
3 Venezuela to more than 40 per 100 000 person years in Sweden and Finland,  
4  
5 respectively [2-4].  
6

7  
8 The concordance rate of type 1 diabetes among monozygotic twins has been  
9  
10 estimated to 27% [5]. Thus, in the etiology of type 1 diabetes, there is considerable  
11  
12 room for influence of environmental factors acting on genetic predisposition.  
13  
14 Investigating the occurrence of type 1 diabetes in immigrants and their offspring  
15  
16 offers a unique possibility to explore and delineate the gene-environment interaction  
17  
18 for the development of type 1 diabetes.  
19

20  
21 Over the past decades, a rapid rise in the incidence of type 1 diabetes among  
22  
23 individuals below 15 years of age has been reported and also with a shift towards  
24  
25 younger age at onset [6, 7]. These studies, however, have not distinguished between  
26  
27 individuals born to parents with different migration background. If offspring of  
28  
29 immigrants, with varying genetic background, experience the same change in age at  
30  
31 onset as observed in offspring of natives, the importance of early environmental  
32  
33 exposures for the development of type 1 diabetes would be further supported. We  
34  
35 recently reported a decreased risk of type 1 diabetes among the majority of  
36  
37 immigrants in Sweden compared with native Swedes. We also observed a tendency  
38  
39 towards a convergence of risks for type 1 diabetes between offspring of immigrants  
40  
41 as one group and native Swedes [8]. Since immigrants and their offspring are a  
42  
43 heterogeneous population, there is a need to explore if the risk of type 1 diabetes  
44  
45 varies by specific parental country or region of birth.  
46  
47  
48

49  
50 In the present study, we used Swedish nation-wide data collected over 40 years to  
51  
52 investigate the trend and the risk of developing type 1 diabetes in offspring of  
53  
54 immigrants by specific paternal and maternal migration background and by birth  
55  
56  
57  
58  
59  
60

1  
2  
3 cohorts. Since the incidence of type 1 diabetes varies with sex and age [9, 10], the  
4  
5 analyses were stratified by offspring sex and age.  
6  
7

## 8 9 **METHODS**

### 10 *Database*

11  
12 We used information from a newly established, nationwide dataset – The Migration  
13  
14 and Health Cohort (M&H Co.) [11], where data from national, longitudinal clinical,  
15  
16 health and socio - demographic registries have been compiled. This database was  
17  
18 built by individual record-linkage between more than fifteen Swedish national  
19  
20 registries to facilitate studies on diabetes, injuries, cancer, cardiovascular and  
21  
22 psychiatric diseases among immigrants and their descendants in Sweden. The  
23  
24 linkage was done using the Personal Identification Number (PIN), which is uniquely  
25  
26 assigned to each individual that have resided in Sweden for longer than one year  
27  
28 since 1947 [12]. The data used in this study are part of the M&H Co., including: 1)  
29  
30 The Swedish Total Population Register, which covers the entire population  
31  
32 registration in Sweden and is updated on a daily basis. The register contains  
33  
34 information on demographic variables, such as date and place of birth and data on  
35  
36 emigration and immigration [13]. 2) The Cause of Death Register, which contains  
37  
38 information on the date of death, the main and contributing causes of death [14]. 3)  
39  
40 The National Patient Register, including the Inpatient Register. It was established in  
41  
42 1964 but with national coverage since 1987 covering 85-95% of all diagnostic data  
43  
44 [15]. Since 2001, the Patient Register includes information on all registered  
45  
46 outpatient visits to specialist care and day visits to hospitals and covers about 80% of  
47  
48 all visits to the specialized outpatient care [16]. The Patient Register contains data on  
49  
50 the main diagnosis and up to eight secondary diagnoses [15, 16]. 4) The Multi-  
51  
52  
53  
54  
55  
56  
57  
58  
59  
60

1  
2  
3 Generation Register contains links between children and their parents via PINs for all  
4  
5 Swedish inhabitants born after 1931 who were alive in 1960 [17]. 5) The National  
6  
7 Population and Housing Censuses and longitudinal integration database for health  
8  
9 insurance and labor market studies (LISA), contains data on socio-economic,  
10  
11 occupational and demographic variables [18, 19].  
12

13  
14 The linkages between the registers have been completed by Statistics Sweden and  
15  
16 the National Board of Health and Welfare. To ensure confidentiality, the PINs have  
17  
18 been replaced by person-unique serial numbers and a key code is kept at Statistics  
19  
20 Sweden. The study was approved by one of the Regional Ethical Committees in  
21  
22 Stockholm, Sweden (Dnr. 2009/2033-32).  
23

#### 24 25 26 27 *Study cohort*

28  
29 The study population comprised 3,794,477 (51.4%) males and 3,593,765 (48.6%)  
30  
31 females between 0 to 30 years of age, born and living in Sweden any time between  
32  
33 January 1<sup>st</sup>, 1969 and December 31<sup>st</sup>, 2009. We excluded individuals whose parents  
34  
35 had unknown information on country of birth and all individuals who had a history of  
36  
37 type 1 diabetes, before entry into the cohort. The final cohort included 7,098,790  
38  
39 individuals (3,641,304 (51.3%) males and 3,457,486 (48.7%) females) aged 0-30  
40  
41 years and born in Sweden.  
42  
43  
44

#### 45 46 47 *Follow-up*

48  
49 The cohort members were followed from date of birth or January 1<sup>st</sup>, 1969, whichever  
50  
51 occurred last, until the date of diagnosis of type 1 diabetes according to the Swedish  
52  
53 versions of International Classification of Disease (ICD-8: 250, 1969-1986; ICD-9:  
54  
55 250, 1987-1996; ICD-10: E10, 1997 and onwards), emigration, death or end of  
56  
57  
58  
59  
60

1  
2  
3 follow-up (December 31<sup>st</sup>, 2009), whichever occurred first. Every individual in the  
4  
5 cohort were followed for maximum 30 years of age.  
6

7 Since earlier versions of ICD (i.e. 8th and 9th version of ICD) could not disentangle  
8  
9 between different types of diabetes, we have performed sensitivity analysis using  
10  
11 ICD-10 only where we could identify type I diabetes (see method for details).  
12  
13

#### 14 15 16 *Classification of offspring based on parental country of birth*

17  
18 The cohort was divided into four groups according to parental country of birth:  
19  
20 individuals with mothers born outside Sweden (father could be born in Sweden,  
21  
22 abroad or unknown) (n= 345,827); individuals with fathers born outside Sweden  
23  
24 (mother could be born in Sweden, abroad or unknown) (n= 317,397); individuals with  
25  
26 both parents born outside of Sweden (n= 435,045) and individuals with both parents  
27  
28 born in Sweden (n= 6,000,521). We also classified parental country of birth into 6  
29  
30 continents: Africa (North, South, East, West and Middle Africa), Asia (East, West,  
31  
32 South-Central, and South-East Asia), Europe (North, South, East, and West Europe),  
33  
34 Latin America (Caribbean, Central America and South America) Northern America,  
35  
36 and Oceania (Australia/New Zealand, Melanesia, and Micronesia/Polynesia). Based  
37  
38 on the findings from our previous study among immigrant individuals [8], we  
39  
40 categorized Africa into North, East and West Africa; Europe into Finland, North  
41  
42 Europe without Finland, and South-, East-, and West Europe (the latter three as one  
43  
44 group). For the trend and the birth cohort analyses, we pooled all offspring of  
45  
46 immigrants into one group.  
47  
48  
49  
50

#### 51 52 53 *Statistical analysis*

54  
55  
56  
57  
58  
59  
60



1  
2  
3 We estimated Incidence rate ratios (IRRs) with 95% confidence intervals (CIs) using  
4  
5 Poisson regression models. The analyses were adjusted for age at follow-up (in 5  
6  
7 years intervals 0-4, 5-9, 10-14, 15-19, 20-24, and 25-30 years), calendar years of  
8  
9 follow-up (four categories: 1969-1978, 1979-1988, 1989-1998 and 1999-2009) and  
10  
11 education of the mother or father (classified into four levels: 0-9 years, 10-12 years,  
12  
13 13 years or more and unknown). All analyses were performed for females and males  
14  
15 separately. In addition, analyses were made separately for children (0-14 years) and  
16  
17 young adults (15-30 years) where we did not distinguish specific parental region or  
18  
19 country of birth. In further analyses, children and young adults (0-30 years) were  
20  
21 pooled together as one category to allow reasonable statistical power for analyses by  
22  
23 specific maternal and paternal regions or country of birth to test the hypothesis that  
24  
25 the mother's and the father's background would affect the offspring's risk of type 1  
26  
27 diabetes differently. We also analyzed risk of type 1 diabetes in children with both  
28  
29 mother and father born in the same country/region. Those with parents from different  
30  
31 regions or from Sweden were categorized as a mixed group.  
32  
33  
34  
35

36 Since we had no specific ICD codes before 1997 to distinguish between type 1 and  
37  
38 type 2 diabetes, we repeated the analysis and confined our cohort to individuals  
39  
40 living in Sweden between 1997 and 2009 where we could strictly identify type 1  
41  
42 diabetes according to ICD-10.  
43  
44

45 For the trend analysis, we further calculated age-standardized rates (ASRs), by  
46  
47 parental migration background for both children (0-14 years) and young adults (15-  
48  
49 30 years), by dividing number of new cases with the estimated numbers of person-  
50  
51 years at risk in 5-years age categories using the world population as standard [20].  
52  
53 ASRs were directly calculated to ensure comparability and to adjust for differences in  
54  
55  
56  
57  
58  
59  
60

1  
2  
3 age in the study population, in each of the age groups 0–4, 5–9, 10–14, 15–19, 20–  
4  
5 24, and 25–30 years. We reported ASR in unit of per 100,000 person years.  
6

7  
8 The Joint point regression analyses were performed to evaluate trends of type 1  
9  
10 diabetes in both offspring to immigrants and offspring to Swedes and in both age  
11  
12 groups [21, 22]. Annual percent change (APC) was estimated, to describe and test  
13  
14 the statistical significance of the trends. The null hypothesis in this analysis is that the  
15  
16 trend in incidence rates is the same over time. We used Statistical Analysis System  
17  
18 (SAS) version 9.3 for all the analysis.  
19  
20

## 21 22 23 **RESULTS**

24  
25 On average, the age of onset of type 1 diabetes was similar in offspring of immigrants  
26  
27 as in offspring of Swedes (mean  $\pm$  SD; offspring of immigrants 14.31 $\pm$ 7.70, offspring  
28  
29 of swedes 15.47 $\pm$  7.99).  
30

31  
32 Over the study period (1969 -2009), we observed a significant increasing trend for  
33  
34 incidence of type 1 diabetes based on joint point regression analyses among  
35  
36 offspring below 15 years of age born to native Swedes and to immigrants (offspring  
37  
38 to Swedes: APC= 3.9, p values<0.001 and offspring to immigrants: APC= 2.2, p  
39  
40 values<0.001 Figure 1). In contrast, no increase or a slight decreasing trend was  
41  
42 observed among young individuals between 15 to 30 years of age regardless of  
43  
44 parental migration background (offspring to Swedes: APC= -0.0, p= 0.9 and offspring  
45  
46 to immigrants: APC= -0.7, p value= 0.08 , Figure 2).  
47  
48

49  
50 The birth cohort analysis revealed a shift towards lower age at onset in individuals  
51  
52 below 15 years of age in both offspring of Swedes and in offspring of immigrants  
53  
54 (Figures 3a and 3b).  
55  
56  
57  
58  
59  
60

1  
2  
3 Compared with offspring of Swedish-born parents, boys and girls (0 to 14 years) with  
4 a foreign-born mother or father had about 30% lower IRR in the multivariable  
5 analyses adjusted for age, calendar period and parental education. Among boys and  
6 girls with both parents born abroad, corresponding risk reductions were about a 40%  
7 (Table 1). The results from the sensitivity analysis, where we repeated the analysis  
8 and confined our cohort to individuals born in Sweden between 1997 and 2009, were  
9 similar to the results of the entire cohort (Supplementary Table 1S).

10  
11  
12 Compared with young adults (15 to 30 years) of Swedish-born parents, young adults  
13 with only one parent born abroad had about 15% to 20% lower IRR of type 1  
14 diabetes and among young adults with both parents born abroad, the risks were  
15 reduced by 25% to 30% (Table 1).

16  
17  
18 Next, we investigated risks of type 1 diabetes by parental region of birth. Compared  
19 with young offspring (0-30 years) of Swedish-born parents, male and female offspring  
20 of mothers or fathers born in Africa had about 20% to 40% higher IRR of type 1  
21 diabetes (Table 2). The increased risk of type 1 diabetes was more prominent among  
22 individuals whose mothers or fathers were born in Eastern Africa. With a few  
23 exceptions, male and female offspring of mothers or fathers born in Asia, Europe  
24 (except Northern Europe), Latin America and Northern America (except female  
25 offspring to fathers from Northern America) had between 35% to 65% lower IRR than  
26 male and female offspring of Swedish-born parents (Table 2). These reductions in  
27 risks became even more prominent when we confined the analyses to parents born  
28 in the same region (Table 2). Offspring of Finnish immigrants and rest of Northern  
29 Europe had almost similar risks compared with offspring of Swedes (Table 2).

30  
31  
32 The results from the sensitivity analysis, where we repeated the analysis and  
33 confined our cohort to individuals born in Sweden between 1997 and 2009 (limited to  
34  
35  
36  
37  
38  
39  
40  
41  
42  
43  
44  
45  
46  
47  
48  
49  
50  
51  
52  
53  
54  
55  
56  
57  
58  
59  
60

1  
2  
3 children ages 0 to 13) , were similar to the results of the entire cohort for the same  
4  
5 age category (Supplementary Tables 2Sa and 2Sb).  
6  
7

## 8 9 **DISCUSSION**

10  
11 In this nation-wide cohort study of Sweden-born children and young adults, we  
12  
13 observed a continuing increase of type 1 diabetes in individuals younger than 15  
14  
15 years of age over the past decades. This increase was, however, less evident among  
16  
17 offspring of immigrants than in offspring of native Swedes. In contrast, no change in  
18  
19 trend was observed among young individuals between 15 to 30 years of age, and  
20  
21 regardless of parental country of birth.  
22  
23

24  
25 An interesting finding in the present study was an almost identical pattern with a shift  
26  
27 towards lower age at onset of type 1 diabetes by younger birth cohorts in both  
28  
29 offspring of foreign born parents and Swedes.  
30

31  
32 Over the past decades, a rapid rise in the incidence of type 1 diabetes has been  
33  
34 demonstrated [23, 24]. The finding of an increased incidence rate of type 1 diabetes  
35  
36 between 1969 and 2009 among individuals below 15 years of age, and a decreasing  
37  
38 or steady incidence rate among young adults, is in line with previous studies from  
39  
40 Sweden [6] and other parts of the world [7]. The observed increasing trend over time  
41  
42 in our study might be due to the quality of National patient Register over time and not  
43  
44 covering all of Sweden for the entire period of our study. This register became nation-  
45  
46 wide in 1987. However, the sharpest increase in incidence observed in our study  
47  
48 among individuals below 15 years of age is after around 1997 when the Inpatient  
49  
50 Register had full coverage and when the ICD-10 were able to disentangle different  
51  
52 types of diabetes.  
53  
54  
55  
56  
57  
58  
59  
60

1  
2  
3 The finding of an almost identical pattern with a shift towards lower age at onset of  
4 type 1 diabetes in both offspring of foreign born parents and Swedes indicates the  
5 exposure to similar environmental factors in both groups. It has been hypothesized  
6 that this developments is due to increased exposures in early life to factors that  
7 initiate and/ or accelerate beta cell destruction, including viral infections, rapid  
8 postnatal growth and nutritional factors [25, 26]. In addition, perinatal factors such as  
9 blood-group incompatibility, high maternal age, preeclampsia and caesarean section  
10 delivery have been shown to be associated with increased incidence of childhood  
11 type 1 diabetes [27]. Similar findings of a shift towards younger age at diagnosis and  
12 a declining incidence of type 1 diabetes among young adults aged 15 to 34 years  
13 were also observed in other studies from Sweden, using the two nation-wide  
14 prospectively collected research register, the Swedish Childhood Diabetes Register  
15 and the Diabetes Incidence Study in Sweden [10, 28]. The shift towards younger age  
16 at diagnosis may be due to risk factors accelerating the disease process.

17  
18 We further found that offspring with one or two parents born abroad had a reduced  
19 risk of type 1 diabetes compared with offspring to Sweden-born parents. The  
20 reduction in risk was similar between sexes and was more apparent among  
21 individuals where both parents were foreign born. Stratification by specific parental  
22 region/country of birth, however, revealed that this reduction was confined to  
23 offspring of immigrants from Asia, Latin and North America, South-, West- and East  
24 Europe. In contrast, the IRR for type 1 diabetes was increased in individuals with  
25 African parents, particularly so if the parents were born in Eastern or Northern Africa.  
26 The observed increased risk among offspring of Africans in this study, in line with a  
27 previous Swedish register study [29] is also observed in Swedish residents born in  
28 Africa [8, 29]. It is unclear if these findings reflect a high risk of type 1 diabetes in the

1  
2  
3 countries of origin, thus rating Eastern and Northern Africa as the areas with the  
4 highest incidence of type 1 diabetes in the world. At the same time we should keep in  
5 mind that the population of immigrants in Sweden may not represent the population  
6 of countries of origin.  
7  
8  
9

10  
11 The reported low number of type 1 diabetes diagnoses in Africa [30] is most likely to  
12 be underestimated due to lack of diagnostic measures [31], and high mortality  
13 among uncontrolled type 1 diabetes cases as a result of limited access to insulin  
14 treatment [32]. Moreover, priorities are mostly given to the high burden of  
15 communicable diseases in African countries [33], especially in busy emergency  
16 hospitals. As a consequence, children with diabetic ketoacidosis at the time of  
17 diagnosis [34] could be misdiagnosed as cerebral malaria or meningitis [35] which  
18 would also lead to an underestimation of type 1 diabetes cases. The observed higher  
19 risk in African offspring in the present study and the increased risk of type 1 diabetes  
20 in Swedish residents born in Africa [8] might be due to genetic propensity interacting  
21 with environmental factors in the new home country.  
22  
23  
24  
25  
26  
27  
28  
29  
30  
31  
32  
33  
34  
35

36 Offspring of Swedish residents born in Asia, Latin and North America, South-, West-  
37 and East Europe retained the low risk profile were recently observed in young  
38 immigrants in Sweden born in these areas [8]. This risk reduction was independent of  
39 maternal or paternal birth region but was stronger if both parents were born in the  
40 same region.  
41  
42  
43  
44  
45  
46

47 The importance of parental country of birth for the risk of developing type 1 diabetes  
48 has also been observed in other studies [36-39] and may indicate the role of genetic  
49 factors [40, 41]. Children of Sardinian heritage (a high risk area), born and living in  
50 Lazio (a low risk area) retained the high risk profile of Sardinia [42]. The risk for type  
51 1 diabetes in children of Yugoslavian, Italian and Greek heritage in Germany was  
52  
53  
54  
55  
56  
57  
58  
59  
60

1  
2  
3 closer to the reported incidence in those countries than in Germany [43] However,  
4 the importance of life style or environmental factors interacting with genetic factors  
5 cannot be ruled out [44] as studies of immigration from regions with low to high  
6 incidence of type 1 diabetes have been associated with increased incidence of type 1  
7 diabetes [37] .  
8  
9

10  
11  
12  
13  
14 The primary strength of our study is the nation-wide cohort design with nearly  
15 complete follow-up of type 1 diabetes occurrence over several decades. Using a  
16 unique PIN assigned to all Swedish citizens, we were able to correctly assess  
17 exposure (parental country of birth) and thus avoiding misclassification bias.  
18  
19  
20

21  
22 We lacked specific ICD codes for type 1 diabetes in the earlier versions of ICD before  
23 1997 (i.e. 8<sup>th</sup> and 9<sup>th</sup> version of ICD). However, the results of the sensitivity analysis  
24 limited to only cases of type 1 diabetes according to ICD 10 for the years 1997 and  
25 forward were similar to the results for the entire period of the study. But, in this  
26 sensitivity analysis, we were only able to verify the results for children born between  
27 1997 and 2009 (0 to 13 years old). Whereas, for the age groups over 15 years when  
28 type 1 diabetes is more likely to be mixed with type 2 diabetes, we had no data.  
29 However, the prevalence of type 2 diabetes is low in Sweden [45, 46] and other  
30 northern European countries and most likely the majority of cases of diabetes  
31 diagnosed before 30 years are true type 1 diabetes. While this may not be applicable  
32 for offspring born to parents from other parts of the world with known high prevalence  
33 of type 2 diabetes which may have led to overestimation of the true type 1 diabetes.  
34  
35  
36  
37  
38  
39  
40  
41  
42  
43  
44  
45  
46  
47  
48

49 Our findings of a lower IRR of type 1 diabetes among children and young adults with  
50 one or two foreign born parents, with the notable exception of offspring of African  
51 immigrants, and the shifting of age at diagnosis towards younger age in both  
52  
53  
54  
55  
56  
57  
58  
59  
60

1  
2  
3 offspring of Swedes and of immigrants highlight the important role of environmental  
4 factors and its interaction with genetic background in the etiology of type 1 diabetes.  
5  
6

7 In order to further clarify potential pathophysiological mechanisms for the  
8 development of type1 diabetes, further studies are needed with data on important  
9 exposures such as viral infections in early life, nutritional habits and weight gain in  
10 infancy. Moreover, studies on offspring of immigrants from African countries, in  
11 particular from Eastern Africa, might improve our understanding on the etiology of the  
12 disease.  
13  
14  
15  
16  
17  
18  
19  
20  
21  
22  
23  
24  
25  
26  
27  
28  
29  
30  
31  
32  
33  
34  
35  
36  
37  
38  
39  
40  
41  
42  
43  
44  
45  
46

#### 47 **Acknowledgements**

48  
49 This work was supported by grants from The Ministry of Higher Education and  
50 Scientific Research-Kurdistan Regional Government/Iraq, and the Department of  
51 Environmental Medicine, Karolinska institutet, Stockholm, Sweden.  
52  
53  
54  
55  
56  
57  
58  
59  
60



1  
2  
3 The authors thank Professor Sven Cnattingius, for his critical review of the  
4  
5 manuscript.  
6  
7

8  
9  
10 The authors appreciate the help from Statistics Sweden and the National Board of  
11  
12 Health and Welfare, which provided them with data  
13

### 14 15 16 **Competing interests**

17  
18 No potential conflicts of interest relevant to this article were reported.  
19  
20

### 21 22 23 **Contributors**

24  
25 H.I.H. designed the research, drafted the manuscript, analyzed data, and interpreted  
26  
27 results.  
28

29  
30 M.P. designed the research, interpreted the results critically reviewed and edited the  
31  
32 manuscript.  
33

34  
35 T.M. designed the research, interpreted the results, critically reviewed and edited the  
36  
37 manuscript, handled research data and funding, and supervised.  
38  
39

### 40 41 **Data sharing**

42  
43 no additional data available.  
44  
45  
46  
47  
48  
49  
50  
51  
52  
53  
54  
55  
56  
57  
58  
59  
60

## REFERENCES

1. Dabelea, D., *The accelerating epidemic of childhood diabetes*. Lancet, 2009. **373**(9680): p. 1999-2000.
2. Berhan, Y., et al., *Thirty years of prospective nationwide incidence of childhood type 1 diabetes: the accelerating increase by time tends to level off in Sweden*. Diabetes, 2011. **60**(2): p. 577-81.
3. Kondrashova, A., et al., *A six-fold gradient in the incidence of type 1 diabetes at the eastern border of Finland*. Ann Med, 2005. **37**(1): p. 67-72.
4. Pitkaniemi, J., et al., *Increasing incidence of Type 1 diabetes--role for genes?* BMC Genet, 2004. **5**: p. 5.
5. Hyttinen, V., et al., *Genetic liability of type 1 diabetes and the onset age among 22,650 young Finnish twin pairs: a nationwide follow-up study*. Diabetes, 2003. **52**(4): p. 1052-5.
6. Pundziute-Lycka, A., et al., *The incidence of Type I diabetes has not increased but shifted to a younger age at diagnosis in the 0-34 years group in Sweden 1983-1998*. Diabetologia, 2002. **45**(6): p. 783-91.
7. Weets, I., et al., *The incidence of type 1 diabetes in the age group 0-39 years has not increased in Antwerp (Belgium) between 1989 and 2000: evidence for earlier disease manifestation*. Diabetes Care, 2002. **25**(5): p. 840-6.
8. Hussen, H.I., et al., *Type I diabetes among children and young adults: the role of country of birth, socioeconomic position and sex*. Pediatr Diabetes, 2012.
9. Karvonen, M., et al., *Sex difference in the incidence of insulin-dependent diabetes mellitus: an analysis of the recent epidemiological data*. World Health Organization DIAMOND Project Group. Diabetes Metab Rev, 1997. **13**(4): p. 275-91.
10. Ostman, J., et al., *Gender differences and temporal variation in the incidence of type 1 diabetes: results of 8012 cases in the nationwide Diabetes Incidence Study in Sweden 1983-2002*. J Intern Med, 2008. **263**(4): p. 386-94.
11. Beiki, O., B. Stegmayr, and T. Moradi, *Country reports: Sweden*, in *Migration-sensitive Cancer Registration in Europe* O. Razum, et al., Editors. 2011, Lang p. 106-123.
12. Ludvigsson, J.F., et al., *The Swedish personal identity number: possibilities and pitfalls in healthcare and medical research*. Eur J Epidemiol, 2009. **24**(11): p. 659-67.
13. Johannesson, I., *The total population register of statistics Sweden. New possibilities and better quality*. Statistics Sweden: Örebro. 2002.
14. Socialstyrelsen, *Causes of death, The National Board of Health and Welfare, CENTRE FOR EPIDEMIOLOGY*. Official Statistics of Sweden, 2007.
15. Ludvigsson, J.F., et al., *External review and validation of the Swedish national inpatient register*. BMC Public Health, 2011. **11**: p. 450.
16. Socialstyrelsen. *Kvalitet och innehåll i patientregistret*. 2009 [cited 2010 08-05]; Available from: [www.socialstyrelsen.se](http://www.socialstyrelsen.se), The National Board of Health and Welfare.
17. *The Multi-Generation Registry. Bakgrundsfakta till befolknings-och välfärdstatistik*. Statistiska Centralbyrån: Örebro; 2001.
18. Statistics\_Sweden. *Folk- och bostadsräkningar, FoB*. 2010 [cited 2010 02-25]; Available from: [www.scb.se](http://www.scb.se).
19. Socialstyrelsen. *Longitudinal integration database for health insurance and labour market studies (LISA by Swedish acronym)*. 2010 [cited 2010 08-10]; Available from: [www.socialstyrelsen.se](http://www.socialstyrelsen.se).
20. Omar B. Ahmad, C.B.-P., Alan D. Lopez, Christopher JL Murray, Rafael Lozano, Mie Inoue, *AGE STANDARDIZATION OF RATES: A NEW WHO STANDARD*. GPE Discussion Paper Series: No.31, EIP/GPE/EBD, World Health Organization 2001.
21. *Statistical Research and Applications Branch NCI. Joinpoint regression program*. 2008. **Version 3.3.1**.

- 1
  - 2
  - 3
  - 4
  - 5
  - 6
  - 7
  - 8
  - 9
  - 10
  - 11
  - 12
  - 13
  - 14
  - 15
  - 16
  - 17
  - 18
  - 19
  - 20
  - 21
  - 22
  - 23
  - 24
  - 25
  - 26
  - 27
  - 28
  - 29
  - 30
  - 31
  - 32
  - 33
  - 34
  - 35
  - 36
  - 37
  - 38
  - 39
  - 40
  - 41
  - 42
  - 43
  - 44
  - 45
  - 46
  - 47
  - 48
  - 49
  - 50
  - 51
  - 52
  - 53
  - 54
  - 55
  - 56
  - 57
  - 58
  - 59
  - 60
22. Kim, H.J., et al., *Permutation tests for joinpoint regression with applications to cancer rates*. Stat Med, 2000. **19**(3): p. 335-51.
23. Green, A. and C.C. Patterson, *Trends in the incidence of childhood-onset diabetes in Europe 1989-1998*. Diabetologia, 2001. **44 Suppl 3**: p. B3-8.
24. *Incidence and trends of childhood Type 1 diabetes worldwide 1990-1999*. Diabetic Medicine, 2006. **23**(8): p. 857-866.
25. Dahlquist, G., *Can we slow the rising incidence of childhood-onset autoimmune diabetes? The overload hypothesis*. Diabetologia, 2006. **49**(1): p. 20-4.
26. Haynes, A., et al., *Perinatal risk factors for childhood Type 1 diabetes in Western Australia--a population-based study (1980-2002)*. Diabet Med, 2007. **24**(5): p. 564-70.
27. Dahlquist, G.G., C. Patterson, and G. Soltesz, *Perinatal risk factors for childhood type 1 diabetes in Europe. The EURODIAB Substudy 2 Study Group*. Diabetes Care, 1999. **22**(10): p. 1698-702.
28. Dahlquist, G.G., L. Nystrom, and C.C. Patterson, *Incidence of type 1 diabetes in Sweden among individuals aged 0-34 years, 1983-2007: an analysis of time trends*. Diabetes Care, 2011. **34**(8): p. 1754-9.
29. Hjern, A., U. Soderstrom, and J. Aman, *East Africans in Sweden have a high risk for type 1 diabetes*. Diabetes Care, 2012. **35**(3): p. 597-8.
30. Karvonen, M., et al., *Incidence of childhood type 1 diabetes worldwide. Diabetes Mondiale (DiaMond) Project Group*. Diabetes Care, 2000. **23**(10): p. 1516-26.
31. Hall, V., et al., *Diabetes in Sub Saharan Africa 1999-2011: epidemiology and public health implications. A systematic review*. BMC Public Health, 2011. **11**: p. 564.
32. <http://www.idf.org/diabetesatlas/5e/africa>.
33. Majaliwa, E.S., et al., *Type 1 diabetes mellitus in the African population: epidemiology and management challenges*. Acta Biomed, 2008. **79**(3): p. 255-9.
34. Monabeka, H.G., A. Mbika-Cardorelle, and G. Moyon, *[Ketoacidosis in children and teenagers in Congo]*. Sante, 2003. **13**(3): p. 139-41.
35. Rwiza, H.T., A.B. Swai, and D.G. McLarty, *Failure to diagnose diabetic ketoacidosis in Tanzania*. Diabet Med, 1986. **3**(2): p. 181-3.
36. Hjern, A. and U. Soderstrom, *Parental country of birth is a major determinant of childhood type 1 diabetes in Sweden*. Pediatr Diabetes, 2008. **9**(1): p. 35-9.
37. Cataldo, F., *Early onset of Type 1 diabetes mellitus in immigrant children from developing countries to Western Europe: the role of environmental factors?* J Endocrinol Invest, 2005. **28**(6): p. 574-5.
38. Soderstrom, U., J. Aman, and A. Hjern, *Being born in Sweden increases the risk for type 1 diabetes - a study of migration of children to Sweden as a natural experiment*. Acta Paediatr, 2012. **101**(1): p. 73-7.
39. Podar, T., et al., *Risk of childhood type 1 diabetes for Russians in Estonia and Siberia*. Int J Epidemiol, 1993. **22**(2): p. 262-7.
40. Patrick, S.L., et al., *IDDM incidence in a multiracial population. The Hawaii IDDM Registry, 1980-1990*. Diabetes Care, 1997. **20**(6): p. 983-7.
41. Ji, J., et al., *Ethnic differences in incidence of type 1 diabetes among second-generation immigrants and adoptees from abroad*. J Clin Endocrinol Metab, 2010. **95**(2): p. 847-50.
42. Muntoni, S., et al., *Incidence of insulin-dependent diabetes mellitus among Sardinian-heritage children born in Lazio region, Italy*. Lancet, 1997. **349**(9046): p. 160-2.
43. Neu, A., et al., *Diabetes incidence in children of different nationalities: an epidemiological approach to the pathogenesis of diabetes*. Diabetologia, 2001. **44 Suppl 3**: p. B21-6.
44. Zung, A., et al., *Type 1 diabetes in Jewish Ethiopian immigrants in Israel: HLA class II immunogenetics and contribution of new environment*. Hum Immunol, 2004. **65**(12): p. 1463-8.
45. Arnqvist, H.J., et al., *Difficulties in classifying diabetes at presentation in the young adult*. Diabet Med, 1993. **10**(7): p. 606-13.

- 1  
2  
3 46. Lynch, K.F., et al., *Context and disease when disease risk is low: the case of type 1 diabetes in*  
4 *Sweden*. J Epidemiol Community Health, 2010. **64**(9): p. 789-95.  
5  
6  
7  
8  
9

10 Figure legends

11  
12 Figure 1 – Age-standardized type 1 diabetes incidence rate per 100,000 person-  
13 years (ASR) among offspring of Swedes of immigrants in the age group (0-14), 1969-  
14 2009, Sweden  
15

16  
17 Figure 2 - Age-standardized type 1 diabetes incidence rate per 100,000 person-years  
18 (ASR) among offspring of Swedes of immigrants in the age group (15-30), 1969-  
19 2009, Sweden  
20

21  
22 Figure 3a – Incidence of type 1 diabetes by age at diagnosis (0-30 years) and birth  
23 cohorts 1960-2009 among offspring of Swedes in Sweden  
24

25  
26 Figure 3b - – Incidence of type 1 diabetes by age at diagnosis (0-30 years) and birth  
27 cohorts 1960-2009 among offspring of Immigrants in Sweden  
28  
29  
30  
31  
32  
33  
34  
35  
36  
37  
38  
39  
40  
41  
42  
43  
44  
45  
46  
47  
48  
49  
50  
51  
52  
53  
54  
55  
56  
57  
58  
59  
60

1  
2  
3  
4  
5  
6  
7  
8  
9  
10  
11  
12  
13  
14  
15  
16  
17  
18  
19  
20  
21  
22  
23  
24  
25  
26  
27  
28  
29  
30  
31  
32  
33  
34  
35  
36  
37  
38  
39  
40  
41  
42  
43  
44  
45  
46  
47  
48  
49  
50  
51  
52  
53  
54  
55  
56  
57  
58  
59  
60

For peer review only

Figures

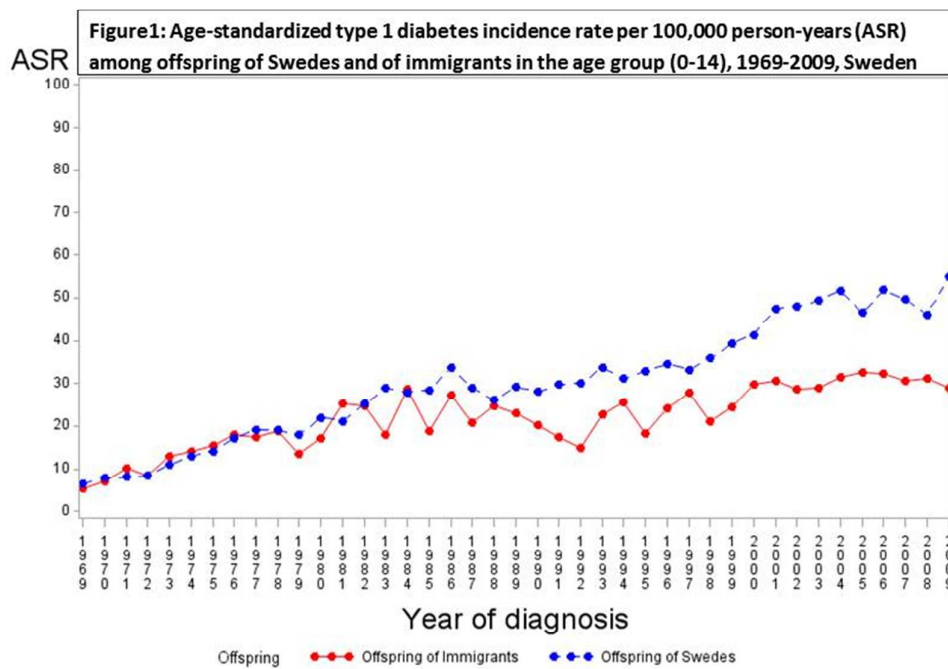

1  
2  
3  
4  
5  
6  
7  
8  
9  
10  
11  
12  
13  
14  
15  
16  
17  
18  
19  
20  
21  
22  
23  
24  
25  
26  
27  
28  
29  
30  
31  
32  
33  
34  
35  
36  
37  
38  
39  
40  
41  
42  
43  
44  
45  
46  
47  
48  
49  
50  
51  
52  
53  
54  
55  
56  
57  
58  
59  
60

For peer review only

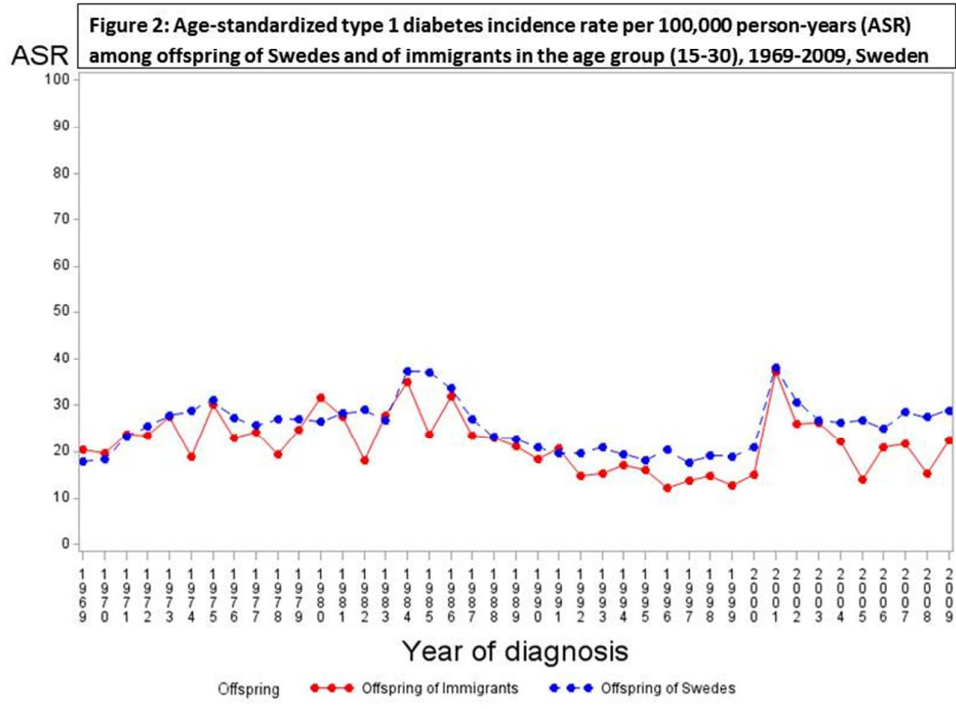

1  
2  
3  
4  
5  
6  
7  
8  
9  
10  
11  
12  
13  
14  
15  
16  
17  
18  
19  
20  
21  
22  
23  
24  
25  
26  
27  
28  
29  
30  
31  
32  
33  
34  
35  
36  
37  
38  
39  
40  
41  
42  
43  
44  
45  
46  
47  
48  
49  
50  
51  
52  
53  
54  
55  
56  
57  
58  
59  
60

For peer review only

Figure 3.A. : Incidence of type 1 diabetes by age at diagnosis (0-30 years) and birth cohorts 1960-2009 among offspring of Swedes in Sweden

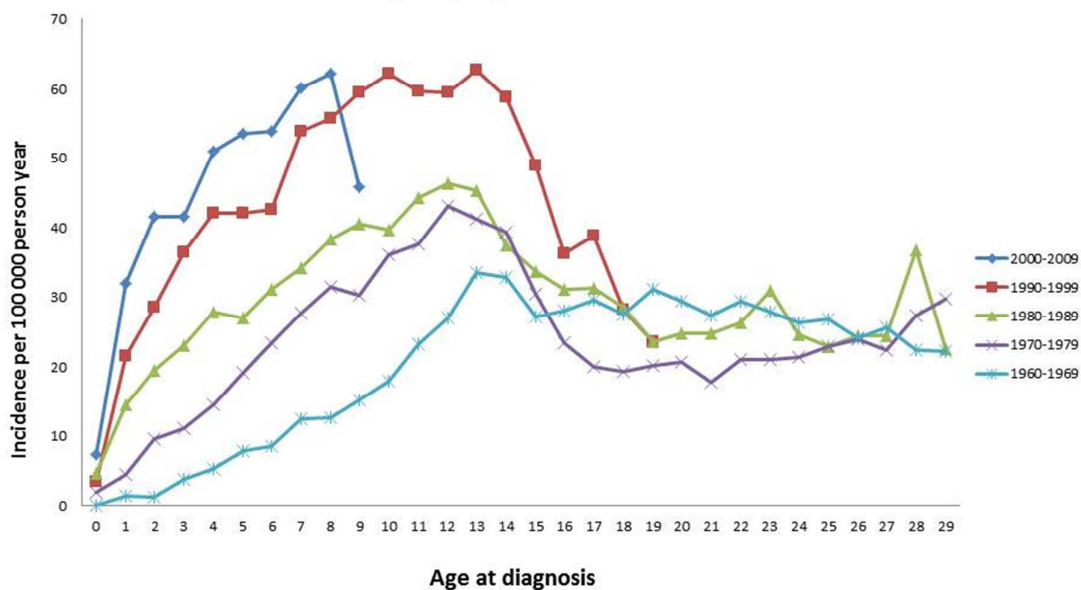

1  
2  
3  
4  
5  
6  
7  
8  
9  
10  
11  
12  
13  
14  
15  
16  
17  
18  
19  
20  
21  
22  
23  
24  
25  
26  
27  
28  
29  
30  
31  
32  
33  
34  
35  
36  
37  
38  
39  
40  
41  
42  
43  
44  
45  
46  
47  
48  
49  
50  
51  
52  
53  
54  
55  
56  
57  
58  
59  
60

For peer review only

Figure 3.B: Incidence of type 1 diabetes by age at diagnosis (0-30 years) and birth cohorts 1960-2009 among offspring of Immigrants in Sweden

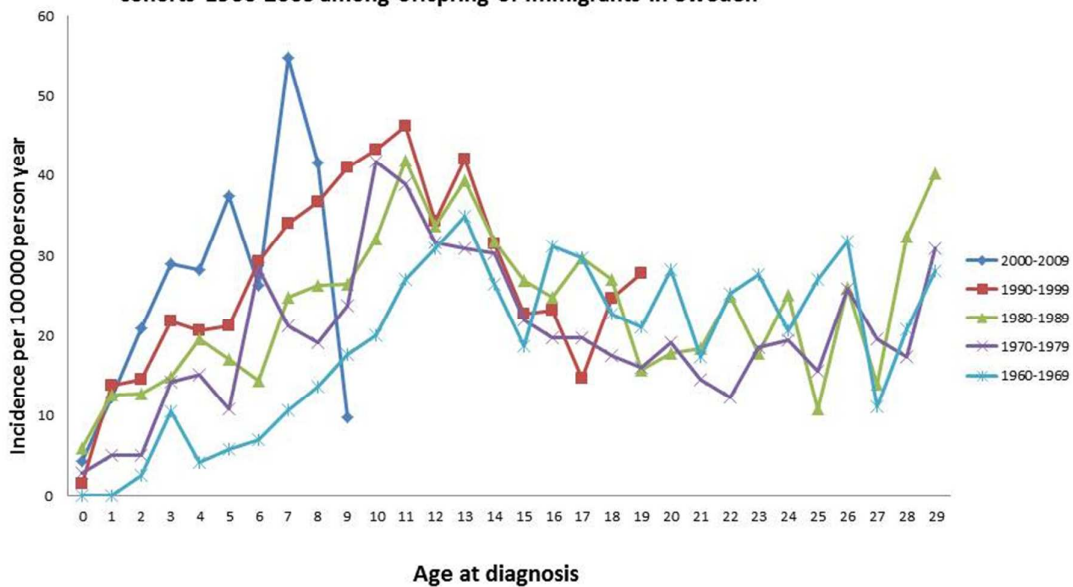



**Table 1: Incidence rate ratio (IRR) and 95% confidence interval (CI) of type 1 diabetes among children aged (0-14) and young adults aged (15-30) by sex and parental country of birth, Sweden, 1969–2009.**

| Parental immigration Status | Male (0-14) |         |                  |                  | Female (0-14) |         |                  |                  |
|-----------------------------|-------------|---------|------------------|------------------|---------------|---------|------------------|------------------|
|                             | Cases       | PYRs    | IRR* (95% CI)    | IRR† (95% CI)    | Cases         | PYRs    | IRR* (95% CI)    | IRR† (95% CI)    |
| Mother foreign born         | 871         | 3810384 | 0.76 (0.71-0.81) | 0.69 (0.64-0.74) | 808           | 3610118 | 0.79 (0.73-0.85) | 0.71 (0.66-0.77) |

For peer review only

|                                                                                  |      |          |                  |                  |                       |          |                  |                  |  |
|----------------------------------------------------------------------------------|------|----------|------------------|------------------|-----------------------|----------|------------------|------------------|--|
| Father foreign born                                                              | 858  | 3948653  | 0.72 (0.67-0.77) | 0.65 (0.61-0.70) | 833                   | 3764091  | 0.78 (0.73-0.84) | 0.70 (0.65-0.75) |  |
| Both parents foreign born                                                        | 443  | 2249700  | 0.66 (0.60-0.73) | 0.58 (0.52-0.64) | 435                   | 2134846  | 0.73 (0.66-0.80) | 0.62 (0.56-0.69) |  |
| Both parents born in Sweden                                                      | 8334 | 26670322 | 1                | 1                | 7417                  | 25249558 | 1                | 1                |  |
| <b>Male (15-30)</b>                                                              |      |          |                  |                  | <b>Female (15-30)</b> |          |                  |                  |  |
| Mother foreign born                                                              | 624  | 2791560  | 0.82 (0.75-0.89) | 0.79 (0.73-0.86) | 510                   | 2635294  | 0.82 (0.75-0.90) | 0.85 (0.77-0.93) |  |
| Father foreign born                                                              | 618  | 2636310  | 0.86 (0.79-0.93) | 0.83 (0.76-0.90) | 442                   | 2504279  | 0.75 (0.68-0.82) | 0.79 (0.72-0.87) |  |
| Both parents foreign born                                                        | 270  | 1287893  | 0.76 (0.68-0.86) | 0.72 (0.64-0.82) | 204                   | 1215563  | 0.71 (0.62-0.81) | 0.75 (0.65-0.86) |  |
| Both parents born in Sweden                                                      | 8024 | 29689985 | 1                | 1                | 6627                  | 28192526 | 1                | 1                |  |
| * Adjusted for age in five years categories.                                     |      |          |                  |                  |                       |          |                  |                  |  |
| † Mutually adjusted for age, parental education and calendar years of follow-up. |      |          |                  |                  |                       |          |                  |                  |  |

Table 2: Incidence rate ratio (IRR) and 95% confidence interval (CI) of type 1 diabetes among male and female ages 0-30 years by parental country of birth and sex Sweden, 1969-2009.

| Parental country of birth    | IRR* (95 % CI) |                         |       |                         |       |                           |        |                         |       |                         |       |                           |
|------------------------------|----------------|-------------------------|-------|-------------------------|-------|---------------------------|--------|-------------------------|-------|-------------------------|-------|---------------------------|
|                              | Male           |                         |       |                         |       |                           | Female |                         |       |                         |       |                           |
|                              | cases          | Offspring of Mother     | cases | Offspring of Father     | Cases | Offspring of both Parents | cases  | Offspring of Mother     | cases | Offspring of Father     | Cases | Offspring of both Parents |
| Sweden                       | 16358          | 1                       | 16358 | 1                       | 16358 | 1                         | 14044  | 1                       | 14044 | 1                       | 14044 | 1                         |
| Africa                       | 92             | <b>1.42 (1.15-1.75)</b> | 148   | <b>1.19 (1.01-1.41)</b> | 78    | 1.12 (0.90-1.41)          | 86     | <b>1.33 (1.10-1.65)</b> | 129   | <b>1.33 (1.12-1.59)</b> | 75    | <b>1.32 (1.05-1.66)</b>   |
| Northern Africa              | 21             | 1.18 (0.77-1.81)        | 55    | 1.06 (0.81-1.40)        | 16    | 0.86 (0.53- 1.40)         | 26     | 1.27 (0.86-1.86)        | 50    | 1.18 (0.89-1.55)        | 19    | 1.25 (0.80- 1.96)         |
| Western Africa               | 4              | -                       | 17    | 0.89 (0.55-1.42)        | 2     | -                         | 5      | 0.76 (0.32-1.83)        | 12    | 0.99 (0.56-1.74)        | 4     | -                         |
| Eastern Africa               | 66             | <b>1.51 (1.18-1.92)</b> | 70    | <b>1.46 (1.15-1.85)</b> | 58    | <b>1.45 (1.12-1.88)</b>   | 51     | <b>1.47 (1.11-1.93)</b> | 62    | <b>1.61 (1.25-2.10)</b> | 47    | <b>1.44 (1.08-1.92)</b>   |
| Asia                         | 133            | <b>0.37 (0.31-0.44)</b> | 155   | <b>0.40 (0.34-0.47)</b> | 107   | <b>0.36 (0.30-0.44)</b>   | 137    | <b>0.48 (0.40-0.56)</b> | 155   | <b>0.49 (0.42-0.57)</b> | 108   | <b>0.45 (0.37-0.54)</b>   |
| Europe                       |                |                         |       |                         |       |                           |        |                         |       |                         |       |                           |
| Finland                      | 692            | 0.98 (0.91-1.10)        | 523   | 0.99 (0.90-1.08)        | 273   | 0.96 (0.85-1.08)          | 587    | 0.96 (0.89-1.05)        | 442   | 0.97 (0.88-1.06)        | 232   | 0.93 (0.82-1.06)          |
| North Europe (excl. Finland) | 240            | 0.88 (0.77-1.00)        | 258   | 0.89 (0.78-1.00)        | 46    | 0.89 (0.67-1.19)          | 235    | 0.99 (0.87-1.12)        | 231   | 0.91 (0.80-1.04)        | 38    | 0.82 (0.60-1.13)          |
| S.E.W. Europe†               | 284            | <b>0.55 (0.49-0.62)</b> | 319   | <b>0.53 (0.47-0.59)</b> | 110   | <b>0.39 (0.33-0.47)</b>   | 227    | <b>0.53 (0.46-0.60)</b> | 264   | <b>0.52 (0.46-0.58)</b> | 95    | <b>0.41 (0.33-0.50)</b>   |
| Latin America                | 39             | <b>0.56 (0.41-0.77)</b> | 51    | <b>0.65 (0.49-0.87)</b> | 17    | <b>0.39 (0.24-0.63)</b>   | 29     | <b>0.51 (0.35-0.75)</b> | 23    | <b>0.33 (0.21-0.51)</b> | 14    | <b>0.41 (0.24-0.69)</b>   |
| North America                | 13             | <b>0.50 (0.29-0.86)</b> | 20    | <b>0.55 (0.36-0.86)</b> | 0     | -                         | 15     | 0.78 (0.47-1.30)        | 31    | 1.02 (0.72-1.46)        | 0     | -                         |
| Oceania                      | 2              | -                       | 2     | -                       | 0     | -                         | 2      | -                       | 0     | -                       | 0     | -                         |
| Mixed‡                       | 0              | -                       | 0     | -                       | 84    | <b>0.64 (0.52-0.79)</b>   | 0      | -                       | 0     | -                       | 82    | <b>0.75 (0.61-0.94)</b>   |

\* Adjusted for age, parental education and calendar years of follow-up.

† South, East and West Europe

‡ Both parents are not from the same country or region.

IRR significantly different from 1 are bolded.

## Supplementary tables

**Table 1S: Incidence rate ratio (IRR) and 95% confidence interval (CI) of type 1 diabetes among children aged (0-13) by sex and parental country of birth, Sweden, 1997–2009.**

| Parental Migration Status   | Male (0-13) |         |                  |                  | Female (0-13) |         |                  |                  |
|-----------------------------|-------------|---------|------------------|------------------|---------------|---------|------------------|------------------|
|                             | Cases       | PYRs    | IRR* (95% CI)    | IRR† (95% CI)    | Cases         | PYRs    | IRR* (95% CI)    | IRR† (95% CI)    |
| Mother foreign born         | 388         | 1291769 | 0.57 (0.52-0.64) | 0.58 (0.52-0.64) | 371           | 1225944 | 0.60 (0.54-0.66) | 0.59 (0.53-0.66) |
| Father foreign born         | 413         | 1348032 | 0.58 (0.53-0.65) | 0.59 (0.53-0.65) | 392           | 1285912 | 0.60 (0.54-0.66) | 0.60 (0.54-0.66) |
| Both parents foreign born   | 221         | 869641  | 0.49 (0.43-0.56) | 0.50 (0.43-0.57) | 223           | 826716  | 0.54 (0.47-0.61) | 0.53 (0.46-0.61) |
| Both parents born in Sweden | 3710        | 6742640 | 1                | 1                | 3427          | 6380947 | 1                | 1                |

\* Adjusted for age in four years categories.

† Mutually adjusted for age, parental education and calendar years of follow-up.

Table 2Sa: Incidence rate ratio (IRR) and 95% confidence interval (CI) of type 1 diabetes among male and female ages 0-13 years by parental country of birth and sex, Sweden, 1997-2009.

| Parental country of birth    | IRR* (95 % CI) |                         |       |                         |       |                           |        |                         |       |                         |       |                           |
|------------------------------|----------------|-------------------------|-------|-------------------------|-------|---------------------------|--------|-------------------------|-------|-------------------------|-------|---------------------------|
|                              | Male           |                         |       |                         |       |                           | Female |                         |       |                         |       |                           |
|                              | cases          | Offspring of Mother     | cases | Offspring of Father     | Cases | Offspring of both Parents | cases  | Offspring of Mother     | cases | Offspring of Father     | Cases | Offspring of both Parents |
| Sweden                       | 3710           | 1                       | 3710  | 1                       | 3710  | 1                         | 3427   | 1                       | 3427  | 1                       | 3427  | 1                         |
| Africa                       | 70             | <b>1.27 (1.00-1.61)</b> | 92    | <b>1.23 (1.00-1.51)</b> | 64    | 1.10 (0.86-1.41)          | 63     | 1.12 (0.87-1.44)        | 81    | 1.19 (0.95-1.48)        | 58    | 1.07 (0.82-1.39)          |
| Northern Africa              | 15             | 1.32 (0.79-2.19)        | 25    | 1.04 (0.70-1.54)        | 12    | 1.07 (0.61-1.89)          | 19     | 1.52 (0.97-2.39)        | 26    | 1.40 (0.95-2.05)        | 13    | 1.27 (0.74-2.20)          |
| Western Africa               | 2              | -                       | 8     | 1.05 (0.53-2.11)        | 2     | -                         | 3      | -                       | 4     | -                       | 3     | -                         |
| Eastern Africa               | 53             | 1.29 (0.98-1.69)        | 57    | <b>1.32 (1.02-1.72)</b> | 49    | 1.26 (0.95-1.68)          | 39     | 1.02 (0.74-1.40)        | 47    | 1.18 (0.89-1.58)        | 38    | 1.04 (0.76-1.44)          |
| Asia                         | 95             | <b>0.41 (0.33-0.50)</b> | 102   | <b>0.43 (0.35-0.52)</b> | 79    | <b>0.39 (0.31-0.49)</b>   | 86     | <b>0.40 (0.32-0.50)</b> | 94    | <b>0.43 (0.35-0.52)</b> | 68    | <b>0.35 (0.28-0.45)</b>   |
| Europe                       |                |                         |       |                         |       |                           |        |                         |       |                         |       |                           |
| Finland                      | 87             | 1.05 (0.85-1.30)        | 79    | 1.09 (0.87-1.36)        | 20    | 1.27 (0.82-1.97)          | 83     | 1.07 (0.86-1.33)        | 68    | 0.99 (0.77-1.25)        | 17    | 1.15 (0.71-1.85)          |
| North Europe (excl. Finland) | 37             | 0.89 (0.65-1.24)        | 45    | 0.86 (0.64-1.16)        | 3     | -                         | 34     | 0.88 (0.63-1.23)        | 41    | 0.86 (0.63-1.17)        | 2     | -                         |
| S.E.W. Europe†               | 73             | <b>0.47 (0.37-0.59)</b> | 69    | <b>0.42 (0.33-0.54)</b> | 23    | <b>0.23 (0.15-0.35)</b>   | 80     | <b>0.56 (0.45-0.70)</b> | 86    | <b>0.56 (0.45-0.69)</b> | 46    | <b>0.49 (0.37-0.66)</b>   |
| Latin America                | 23             | <b>0.63 (0.42-0.95)</b> | 20    | <b>0.62 (0.40-0.96)</b> | 6     | <b>0.28 (0.13-0.62)</b>   | 19     | <b>0.58 (0.37-0.91)</b> | 11    | <b>0.33 (0.18-0.60)</b> | 8     | <b>0.41 (0.20-0.81)</b>   |
| North America                | 3              | -                       | 4     | -                       | 0     | -                         | 6      | 1.04 (0.47-2.32)        | 11    | 1.02 (0.57-1.85)        | 0     | -                         |
| Oceania                      | -              | -                       | 2     | -                       | 0     | -                         | 0      | -                       | 0     | -                       | 0     | -                         |
| Mixed‡                       |                |                         |       |                         | 17    | <b>0.47 (0.29-0.76)</b>   |        |                         |       |                         | 17    | <b>0.51 (0.32-0.82)</b>   |

\* Adjusted for age, parental education and calendar years of follow-up.

† South, East and West Europe

‡ Both parents are not from the same country or region.

IRRs significantly different from 1 are bolded.

Table 2Sb: Incidence rate ratio (IRR) and 95% confidence interval (CI) of type 1 diabetes among male and female ages 0-13 years by parental country of birth and sex, Sweden, 1969-2009.

| Parental country of birth    | IRR* (95 % CI) |                         |       |                         |       |                           |        |                         |       |                         |       |                           |
|------------------------------|----------------|-------------------------|-------|-------------------------|-------|---------------------------|--------|-------------------------|-------|-------------------------|-------|---------------------------|
|                              | Male           |                         |       |                         |       |                           | Female |                         |       |                         |       |                           |
|                              | cases          | Offspring of Mother     | cases | Offspring of Father     | Cases | Offspring of both Parents | cases  | Offspring of Mother     | cases | Offspring of Father     | Cases | Offspring of both Parents |
| Sweden                       | 6620           | 1                       | 6620  | 1                       | 6620  | 1                         | 6319   | 1                       | 6319  | 1                       | 6319  | 1                         |
| Africa                       | 76             | <b>1.34 (1.07-1.68)</b> | 111   | <b>1.24 (1.03-1.50)</b> | 68    | 1.12 (0.88-1.42)          | 70     | 1.16 (0.92-1.47)        | 96    | 1.15 (0.94-1.41)        | 62    | 1.08 (0.84-1.39)          |
| Northern Africa              | 15             | 1.12 (0.67-1.86)        | 36    | 1.07 (0.77-1.49)        | 12    | 0.88 (0.50-1.55)          | 21     | 1.38 (0.90-2.12)        | 34    | 1.09 (0.78-1.53)        | 14    | 1.08 (0.64-1.82)          |
| Western Africa               | 3              | -                       | 11    | 0.92 (0.51-1.66)        | 2     | -                         | 4      | -                       | 6     | 0.63 (0.28-1.40)        | 3     | -                         |
| Eastern Africa               | 58             | <b>1.42 (1.10-1.85)</b> | 62    | <b>1.42 (1.10-1.82)</b> | 52    | <b>1.36 (1.04-1.79)</b>   | 42     | 1.12 (0.82-1.51)        | 52    | 1.29 (0.98-1.70)        | 40    | 1.12 (0.82-1.52)          |
| Asia                         | 103            | <b>0.39 (0.32-0.48)</b> | 115   | <b>0.42 (0.35-0.50)</b> | 84    | <b>0.37 (0.30-0.46)</b>   | 98     | <b>0.38 (0.31-0.46)</b> | 113   | <b>0.43 (0.36-0.52)</b> | 77    | <b>0.35 (0.28-0.44)</b>   |
| Europe                       |                |                         |       |                         |       |                           |        |                         |       |                         |       |                           |
| Finland                      | 274            | 1.08 (0.95-1.22)        | 224   | 1.09 (0.95-1.25)        | 112   | 1.20 (0.99-1.45)          | 279    | 1.10 (0.98-1.25)        | 232   | 1.13 (0.99-1.28)        | 119   | <b>1.23 (1.03-1.48)</b>   |
| North Europe (excl. Finland) | 85             | 0.88 (0.71-1.09)        | 84    | 0.75 (0.61-0.93)        | 8     | 0.52 (0.26-1.05)          | 89     | 0.99 (0.80-1.22)        | 103   | 0.93 (0.76-1.13)        | 11    | 0.69 (0.38-1.25)          |
| S.E.W. Europe†               | 134            | <b>0.53 (0.44-0.63)</b> | 133   | <b>0.46 (0.38-0.54)</b> | 45    | <b>0.30 (0.22-0.40)</b>   | 130    | <b>0.53 (0.45-0.64)</b> | 146   | <b>0.52 (0.44-0.61)</b> | 59    | <b>0.41 (0.32-0.53)</b>   |
| Latin America                | 27             | <b>0.56 (0.39-0.82)</b> | 30    | <b>0.64 (0.45-0.92)</b> | 9     | <b>0.30 (0.16-0.58)</b>   | 23     | <b>0.52 (0.35-0.78)</b> | 15    | <b>0.30 (0.18-0.51)</b> | 11    | <b>0.40 (0.22-0.72)</b>   |
| North America                | 4              | -                       | 8     | <b>0.44 (0.22-0.88)</b> | 0     | -                         | 8      | 0.82 (0.41-1.65)        | 15    | 0.87 (0.52-1.44)        | 0     | -                         |
| Oceania                      | 1              | -                       | 2     | -                       | 0     | -                         | 1      | -                       | 0     | -                       | 0     | -                         |
| Mixed‡                       |                |                         |       |                         | 26    | <b>0.53 (0.36-0.78)</b>   |        |                         |       |                         | 23    | <b>0.49 (0.33-0.75)</b>   |

\* Adjusted for age, parental education and calendar years of follow-up.

† South, East and West Europe

‡ Both parents are not from the same country or region.

IRRs significantly different from 1 are bolded.

1  
2  
3 **The trends and the risk of type 1 diabetes over the past 40 years: an analysis**  
4 **by birth cohorts and by parental migration background in Sweden**  
5  
6  
7

8  
9 Hozan Ismael Hussen<sup>\*1</sup>, Martina Persson<sup>2</sup>, Tahereh Moradi<sup>1,3</sup>  
10  
11

12  
13  
14 <sup>1</sup>Department of Environmental Medicine, Division of Epidemiology, Unit of  
15 Cardiovascular Epidemiology, Karolinska Institutet, Stockholm, Sweden.  
16

17  
18 <sup>2</sup>Department of Medicine, Clinical Epidemiology Unit, Karolinska University Hospital,  
19 Stockholm, Sweden.  
20

21  
22 <sup>3</sup>Centre for Epidemiology and Social Medicine, Health Care Services, Stockholm  
23 County Council, Sweden  
24  
25  
26  
27

28  
29 **\*Corresponding author:**  
30

31 Hozan Ismael Hussen, MD  
32

33 Department of Environmental Medicine, Division of Epidemiology,  
34

35 Unit of Cardiovascular Epidemiology, Karolinska Institutet  
36

37 Nobels väg 13, Box 210,  
38

39 SE-171 77 Stockholm, Sweden  
40

41 Phone: +46-8-524 800 55  
42

43 Fax: +46-8-31 39 36  
44

45 E-mail: hozan.hussen@ki.se  
46  
47  
48  
49

50  
51 **Word count**  
52

53 Main text 3737  
54  
55  
56  
57  
58  
59  
60

**ABSTRACT**

**Objective:** To investigate the trends and the risk of developing type 1 diabetes in offspring of Swedes and immigrants by specific parental migration background, age, sex and birth cohort.

**Design:** Registry-based cohort study.

**Setting:** Using Swedish nation-wide data we analyzed the risk of developing type 1 diabetes in 3,457,486 female and 3,641,304 male offspring between 0-30 years of age, born to native Swedes or immigrants, and born and living in Sweden between 1969 and 2009. We estimated Incidence rate ratios (IRRs) with 95% confidence intervals using Poisson regression models. We further calculated age-standardized rates (ASRs) of type 1 diabetes, using the world population as standard.

**Results:** We observed a trend of increasing ASRs among offspring below 15 years of age born to native Swedes and a less evident increase among offspring of immigrants. We further observed a shift towards younger age at diagnosis in younger birth cohorts in both groups of offspring.

Compared with offspring of Swedes, children (0 to 14 years) and young adults (15 to 30 years) with one parent born abroad had an overall 30% and 15% to 20% lower IRR, respectively, after multivariable adjustment. The reduction in IRR was even greater among offspring of immigrants if both parents were born abroad. Analysis by specific parental region of birth revealed a 45% to 60% higher IRR among male and female offspring aged 0–30 years of Eastern Africa.

**Conclusions:** Parental country of birth and early exposures to environmental factors play an important role in the etiology of type 1 diabetes.

**Key words**

Type 1 diabetes, Birth Cohort, Incidence, Migration, Sweden



## INTRODUCTION

The epidemic of type 1 diabetes is accelerating in many parts of the world with large impact on the affected individual's life and also with great health economic consequences [1]. There is a wide variation in the incidence of type 1 diabetes between countries, ranging from 0.1 per 100 000 person years in China and Venezuela to more than 40 per 100 000 person years in Sweden and Finland, respectively [2-4].

The concordance rate of type 1 diabetes among monozygotic twins has been estimated to 27% [5]. Thus, in the etiology of type 1 diabetes, there is considerable room for influence of environmental factors acting on genetic predisposition. Investigating the occurrence of type 1 diabetes in immigrants and their offspring offers a unique possibility to explore and delineate the gene-environment interaction for the development of type 1 diabetes.

Over the past decades, a rapid rise in the incidence of type 1 diabetes among individuals below 15 years of age has been reported and also with a shift towards younger age at onset [6, 7]. These studies, however, have not distinguished between individuals born to parents with different migration background. If offspring of immigrants, with varying genetic background, experience the same change in age at onset as observed in offspring of natives, the importance of early environmental exposures for the development of type 1 diabetes would be further supported. We recently reported a decreased risk of type 1 diabetes among the majority of immigrants in Sweden compared with native Swedes. We also observed a tendency towards a convergence of risks for type 1 diabetes between offspring of immigrants as one group and native Swedes [8]. Since immigrants and their offspring are a

1  
2  
3 heterogeneous population, there is a need to explore if the risk of type 1 diabetes  
4 varies by specific parental country or region of birth.  
5  
6

7  
8 In the present study, we used Swedish nation-wide data collected over 40 years to  
9 investigate the trend and the risk of developing type 1 diabetes in offspring of  
10 immigrants by specific paternal and maternal migration background and by birth  
11 cohorts. Since the incidence of type 1 diabetes varies with sex and age [9, 10], the  
12 analyses were stratified by offspring sex and age.  
13  
14  
15  
16  
17  
18  
19

## 20 **METHODS**

### 21 *Database*

22  
23 We used information from a newly established, nationwide dataset – The Migration  
24 and Health Cohort (M&H Co.) [11], where data from national, longitudinal clinical,  
25 health and socio - demographic registries have been compiled. This database was  
26 built by individual record-linkage between more than fifteen Swedish national  
27 registries to facilitate studies on diabetes, injuries, cancer, cardiovascular and  
28 psychiatric diseases among immigrants and their descendants in Sweden. The  
29 linkage was done using the Personal Identification Number (PIN), which is uniquely  
30 assigned to each individual that have resided in Sweden for longer than one year  
31 since 1947 [12]. The data used in this study are part of the M&H Co., including: 1)  
32 The Swedish Total Population Register, which covers the entire population  
33 registration in Sweden and is updated on a daily basis. The register contains  
34 information on demographic variables, such as date and place of birth and data on  
35 emigration and immigration [13]. 2) The Cause of Death Register, which contains  
36 information on the date of death, the main and contributing causes of death [14]. 3)  
37 The National Patient Register, including the Inpatient Register. It was established in  
38  
39  
40  
41  
42  
43  
44  
45  
46  
47  
48  
49  
50  
51  
52  
53  
54  
55  
56  
57  
58  
59  
60

1  
2  
3 1964 but with national coverage since 1987 covering 85-95% of all diagnostic data  
4  
5 [15]. Since 2001, the Patient Register includes information on all registered  
6  
7 outpatient visits to specialist care and day visits to hospitals and covers about 80% of  
8  
9 all visits to the specialized outpatient care [16]. The Patient Register contains data on  
10  
11 the main diagnosis and up to eight secondary diagnoses [15, 16]. 4) The Multi-  
12  
13 Generation Register contains links between children and their parents via PINs for all  
14  
15 Swedish inhabitants born after 1931 who were alive in 1960 [17]. 5) The National  
16  
17 Population and Housing Censuses and longitudinal integration database for health  
18  
19 insurance and labor market studies (LISA), contains data on socio-economic,  
20  
21 occupational and demographic variables [18, 19].  
22  
23

24  
25 The linkages between the registers have been completed by Statistics Sweden and  
26  
27 the National Board of Health and Welfare. To ensure confidentiality, the PINs have  
28  
29 been replaced by person-unique serial numbers and a key code is kept at Statistics  
30  
31 Sweden. The study was approved by one of the Regional Ethical Committees in  
32  
33 Stockholm, Sweden (Dnr. 2009/2033-32).  
34  
35

### 36 37 38 *Study cohort*

39  
40 The study population comprised 3,794,477 (51.4%) males and 3,593,765 (48.6%)  
41  
42 females between 0 to 30 years of age, born and living in Sweden any time between  
43  
44 January 1<sup>st</sup>, 1969 and December 31<sup>st</sup>, 2009. We excluded individuals whose parents  
45  
46 had unknown information on country of birth and all individuals who had a history of  
47  
48 type 1 diabetes, before entry into the cohort. The final cohort included 7,098,790  
49  
50 individuals (3,641,304 (51.3%) males and 3,457,486 (48.7%) females) aged 0-30  
51  
52 years and born in Sweden.  
53  
54  
55  
56  
57  
58  
59  
60

### *Follow-up*

The cohort members were followed from date of birth or January 1<sup>st</sup>, 1969, whichever occurred last, until the date of diagnosis of type 1 diabetes according to the Swedish versions of International Classification of Disease (ICD-8: 250, 1969-1986; ICD-9: 250, 1987-1996; ICD-10: E10, 1997 and onwards), emigration, death or end of follow-up (December 31<sup>st</sup>, 2009), whichever occurred first. Every individual in the cohort were followed for maximum 30 years of age.

Since earlier versions of ICD (i.e. 8th and 9th version of ICD) could not disentangle between different types of diabetes, we have performed sensitivity analysis using ICD-10 only where we could identify type I diabetes (see method for details).

### *Classification of offspring based on parental country of birth*

The cohort was divided into four groups according to parental country of birth: individuals with mothers born outside Sweden (father could be born in Sweden, abroad or unknown) (n= 345,827); individuals with fathers born outside Sweden (mother could be born in Sweden, abroad or unknown) (n= 317,397); individuals with both parents born outside of Sweden (n= 435,045) and individuals with both parents born in Sweden (n= 6,000,521). We also classified parental country of birth into 6 continents: Africa (North, South, East, West and Middle Africa), Asia (East, West, South-Central, and South-East Asia), Europe (North, South, East, and West Europe), Latin America (Caribbean, Central America and South America) Northern America, and Oceania (Australia/New Zealand, Melanesia, and Micronesia/Polynesia). Based on the findings from our previous study among immigrant individuals [8], we categorized Africa into North, East and West Africa; Europe into Finland, North Europe without Finland, and South-, East-, and West Europe (the latter three as one

1  
2  
3 group). For the trend and the birth cohort analyses, we pooled all offspring of  
4  
5 immigrants into one group.  
6  
7

### 8 9 *Statistical analysis*

10  
11 We estimated Incidence rate ratios (IRRs) with 95% confidence intervals (CIs) using  
12  
13 Poisson regression models. The analyses were adjusted for age at follow-up (in 5  
14  
15 years intervals 0-4, 5-9, 10-14, 15-19, 20-24, and 25-30 years), calendar years of  
16  
17 follow-up (four categories: 1969-1978, 1979-1988, 1989-1998 and 1999-2009) and  
18  
19 education of the mother or father (classified into four levels: 0-9 years, 10-12 years,  
20  
21 13 years or more and unknown). All analyses were performed for females and males  
22  
23 separately. In addition, analyses were made separately for children (0-14 years) and  
24  
25 young adults (15-30 years) where we did not distinguish specific parental region or  
26  
27 country of birth. In further analyses, children and young adults (0-30 years) were  
28  
29 pooled together as one category to allow reasonable statistical power for analyses by  
30  
31 specific maternal and paternal regions or country of birth to test the hypothesis that  
32  
33 the mother's and the father's background would affect the offspring's risk of type 1  
34  
35 diabetes differently. We also analyzed risk of type 1 diabetes in children with both  
36  
37 mother and father born in the same country/region. Those with parents from different  
38  
39 regions or from Sweden were categorized as a mixed group.  
40  
41  
42  
43  
44

45 Since we had no specific ICD codes before 1997 to distinguish between type 1 and  
46  
47 type 2 diabetes, we repeated the analysis and confined our cohort to individuals  
48  
49 living in Sweden between 1997 and 2009 where we could strictly identify type 1  
50  
51 diabetes according to ICD-10.  
52

53 For the trend analysis, we further calculated age-standardized rates (ASRs), by  
54  
55 parental migration background for both children (0-14 years) and young adults (15-  
56  
57  
58  
59  
60

1  
2  
3 30 years), by dividing number of new cases with the estimated numbers of person-  
4 years at risk in 5-years age categories using the world population as standard [20].  
5  
6  
7 ASRs were directly calculated to ensure comparability and to adjust for differences in  
8  
9 age in the study population, in each of the age groups 0–4, 5–9, 10–14, 15–19, 20–  
10  
11 24, and 25–30 years. We reported ASR in unit of per 100,000 person years.  
12  
13  
14 The Joint point regression analyses were performed to evaluate trends of type 1  
15  
16 diabetes in both offspring to immigrants and offspring to Swedes and in both age  
17  
18 groups [21, 22]. Annual percent change (APC) was estimated, to describe and test  
19  
20 the statistical significance of the trends. The null hypothesis in this analysis is that the  
21  
22 trend in incidence rates is the same over time. We used Statistical Analysis System  
23  
24 (SAS) version 9.3 for all the analysis.  
25  
26  
27  
28  
29

## 30 RESULTS

31  
32 On average, the age of onset of type 1 diabetes was similar in offspring of immigrants  
33  
34 as in offspring of Swedes (mean  $\pm$  SD; offspring of immigrants 14.31 $\pm$ 7.70, offspring  
35  
36 of swedes 15.47 $\pm$  7.99).

37  
38 Over the study period (1969 -2009), we observed a significant increasing trend for  
39  
40 incidence of type 1 diabetes based on joint point regression analyses among  
41  
42 offspring below 15 years of age born to native Swedes and to immigrants (offspring  
43  
44 to Swedes: APC= 3.9, p values<0.001 and offspring to immigrants: APC= 2.2, p  
45  
46 values<0.001 Figure 1). In contrast, no increase or a slight decreasing trend was  
47  
48 observed among young individuals between 15 to 30 years of age regardless of  
49  
50 parental migration background (offspring to Swedes: APC= -0.0, p= 0.9 and offspring  
51  
52 to immigrants: APC= -0.7, p value= 0.08 , Figure 2).  
53  
54  
55  
56  
57  
58  
59  
60

1  
2  
3 The birth cohort analysis revealed a shift towards lower age at onset in individuals  
4 below 15 years of age in both offspring of Swedes and in offspring of immigrants  
5 (Figures 3a and 3b).  
6  
7

8  
9 Compared with offspring of Swedish-born parents, boys and girls (0 to 14 years) with  
10 a foreign-born mother or father had about 30% lower IRR in the multivariable  
11 analyses adjusted for age, calendar period and parental education. Among boys and  
12 girls with both parents born abroad, corresponding risk reductions were about a 40%  
13 (Table 1). The results from the sensitivity analysis, where we repeated the analysis  
14 and confined our cohort to individuals born in Sweden between 1997 and 2009, were  
15 similar to the results of the entire cohort (Supplementary Table 1S).  
16  
17  
18  
19  
20  
21  
22  
23  
24

25 Compared with young adults (15 to 30 years) of Swedish-born parents, young adults  
26 with only one parent born abroad had about 15% to 20% lower IRR of type 1  
27 diabetes and among young adults with both parents born abroad, the risks were  
28 reduced by 25% to 30% (Table 1).  
29  
30  
31  
32  
33

34 Next, we investigated risks of type 1 diabetes by parental region of birth. Compared  
35 with young offspring (0-30 years) of Swedish-born parents, male and female offspring  
36 of mothers or fathers born in Africa had about 20% to 40% higher IRR of type 1  
37 diabetes (Table 2). The increased risk of type 1 diabetes was more prominent among  
38 individuals whose mothers or fathers were born in Eastern Africa. With a few  
39 exceptions, male and female offspring of mothers or fathers born in Asia, Europe  
40 (except Northern Europe), Latin America and Northern America (except female  
41 offspring to fathers from Northern America) had between 35% to 65% lower IRR than  
42 male and female offspring of Swedish-born parents (Table 2). These reductions in  
43 risks became even more prominent when we confined the analyses to parents born  
44  
45  
46  
47  
48  
49  
50  
51  
52  
53  
54  
55  
56  
57  
58  
59  
60

1  
2  
3 in the same region (Table 2). Offspring of Finnish immigrants and rest of Northern  
4  
5 Europe had almost similar risks compared with offspring of Swedes (Table 2).  
6

7 The results from the sensitivity analysis, where we repeated the analysis and  
8  
9 confined our cohort to individuals born in Sweden between 1997 and 2009 (limited to  
10  
11 children ages 0 to 13) , were similar to the results of the entire cohort for the same  
12  
13 age category (Supplementary Tables 2Sa and 2Sb).  
14  
15

## 16 17 18 **DISCUSSION** 19

20 In this nation-wide cohort study of Sweden-born children and young adults, we  
21  
22 observed a continuing increase of type 1 diabetes in individuals younger than 15  
23  
24 years of age over the past decades. This increase was, however, less evident among  
25  
26 offspring of immigrants than in offspring of native Swedes. In contrast, no change in  
27  
28 trend was observed among young individuals between 15 to 30 years of age, and  
29  
30 regardless of parental country of birth.  
31  
32

33 An interesting finding in the present study was an almost identical pattern with a shift  
34  
35 towards lower age at onset of type 1 diabetes by younger birth cohorts in both  
36  
37 offspring of foreign born parents and Swedes.  
38  
39

40 Over the past decades, a rapid rise in the incidence of type 1 diabetes has been  
41  
42 demonstrated [23, 24]. The finding of an increased incidence rate of type 1 diabetes  
43  
44 between 1969 and 2009 among individuals below 15 years of age, and a decreasing  
45  
46 or steady incidence rate among young adults, is in line with previous studies from  
47  
48 Sweden [6] and other parts of the world [7]. The observed increasing trend over time  
49  
50 in our study might be due to the quality of National patient Register over time and not  
51  
52 covering all of Sweden for the entire period of our study. This register became nation-  
53  
54 wide in 1987. However, the sharpest increase in incidence observed in our study  
55  
56  
57  
58  
59  
60



1  
2  
3 among individuals below 15 years of age is after around 1997 when the Inpatient  
4 Register had full coverage and when the ICD-10 were able to disentangle different  
5 types of diabetes.  
6  
7  
8

9  
10 The finding of an almost identical pattern with a shift towards lower age at onset of  
11 type 1 diabetes in both offspring of foreign born parents and Swedes indicates the  
12 exposure to similar environmental factors in both groups. It has been hypothesized  
13 that this developments is due to increased exposures in early life to factors that  
14 initiate and/ or accelerate beta cell destruction, including viral infections, rapid  
15 postnatal growth and nutritional factors [25, 26]. In addition, perinatal factors such as  
16 blood-group incompatibility, high maternal age, preeclampsia and caesarean section  
17 delivery have been shown to be associated with increased incidence of childhood  
18 type 1 diabetes [27]. Similar findings of a shift towards younger age at diagnosis and  
19 a declining incidence of type 1 diabetes among young adults aged 15 to 34 years  
20 were also observed in other studies from Sweden, using the two nation-wide  
21 prospectively collected research register, the Swedish Childhood Diabetes Register  
22 and the Diabetes Incidence Study in Sweden [10, 28]. The shift towards younger age  
23 at diagnosis may be due to risk factors accelerating the disease process.  
24  
25  
26  
27  
28  
29  
30  
31  
32  
33  
34  
35  
36  
37  
38  
39

40 We further found that offspring with one or two parents born abroad had a reduced  
41 risk of type 1 diabetes compared with offspring to Sweden-born parents. The  
42 reduction in risk was similar between sexes and was more apparent among  
43 individuals where both parents were foreign born. Stratification by specific parental  
44 region/country of birth, however, revealed that this reduction was confined to  
45 offspring of immigrants from Asia, Latin and North America, South-, West- and East  
46 Europe. In contrast, the IRR for type 1 diabetes was increased in individuals with  
47  
48  
49  
50  
51  
52  
53  
54  
55  
56  
57  
58  
59  
60

1  
2  
3 African parents, particularly so if the parents were born in Eastern or Northern Africa.  
4  
5 The observed increased risk among offspring of Africans in this study, in line with a  
6  
7 previous Swedish register study [29] is also observed in Swedish residents born in  
8  
9 Africa [8, 29]. It is unclear if these findings reflect a high risk of type 1 diabetes in the  
10  
11 countries of origin, thus rating Eastern and Northern Africa as the areas with the  
12  
13 highest incidence of type 1 diabetes in the world. At the same time we should keep in  
14  
15 mind that the population of immigrants in Sweden may not represent the population  
16  
17 of countries of origin.  
18  
19

20  
21 The reported low number of type 1 diabetes diagnoses in Africa [30] is most likely to  
22  
23 be underestimated due to lack of diagnostic measures [31], and high mortality  
24  
25 among uncontrolled type 1 diabetes cases as a result of limited access to insulin  
26  
27 treatment [32]. Moreover, priorities are mostly given to the high burden of  
28  
29 communicable diseases in African countries [33], especially in busy emergency  
30  
31 hospitals. As a consequence, children with diabetic ketoacidosis at the time of  
32  
33 diagnosis [34] could be misdiagnosed as cerebral malaria or meningitis [35] which  
34  
35 would also lead to an underestimation of type 1 diabetes cases. The observed higher  
36  
37 risk in African offspring in the present study and the increased risk of type 1 diabetes  
38  
39 in Swedish residents born in Africa [8] might be due to genetic propensity interacting  
40  
41 with environmental factors in the new home country.  
42  
43

44  
45 Offspring of Swedish residents born in Asia, Latin and North America, South-, West-  
46  
47 and East Europe retained the low risk profile were recently observed in young  
48  
49 immigrants in Sweden born in these areas [8]. This risk reduction was independent of  
50  
51 maternal or paternal birth region but was stronger if both parents were born in the  
52  
53 same region.  
54  
55  
56  
57  
58  
59  
60

1  
2  
3 The importance of parental country of birth for the risk of developing type 1 diabetes  
4 has also been observed in other studies [36-39] and may indicate the role of genetic  
5 factors [40, 41]. Children of Sardinian heritage (a high risk area), born and living in  
6 Lazio (a low risk area) retained the high risk profile of Sardinia [42]. The risk for type  
7 1 diabetes in children of Yugoslavian, Italian and Greek heritage in Germany was  
8 closer to the reported incidence in those countries than in Germany [43]. However,  
9 the importance of life style or environmental factors interacting with genetic factors  
10 cannot be ruled out [44] as studies of immigration from regions with low to high  
11 incidence of type 1 diabetes have been associated with increased incidence of type 1  
12 diabetes [37].

13  
14  
15  
16  
17  
18  
19  
20  
21  
22  
23  
24  
25 The primary strength of our study is the nation-wide cohort design with nearly  
26 complete follow-up of type 1 diabetes occurrence over several decades. Using a  
27 unique PIN assigned to all Swedish citizens, we were able to correctly assess  
28 exposure (parental country of birth) and thus avoiding misclassification bias.

29  
30  
31  
32  
33  
34 We lacked specific ICD codes for type 1 diabetes in the earlier versions of ICD before  
35 1997 (i.e. 8<sup>th</sup> and 9<sup>th</sup> version of ICD). However, the results of the sensitivity analysis  
36 limited to only cases of type 1 diabetes according to ICD 10 for the years 1997 and  
37 forward were similar to the results for the entire period of the study. But, in this  
38 sensitivity analysis, we were only able to verify the results for children born between  
39 1997 and 2009 (0 to 13 years old). Whereas, for the age groups over 15 years when  
40 type 1 diabetes is more likely to be mixed with type 2 diabetes, we had no data.  
41 However, the prevalence of type 2 diabetes is low in Sweden [45, 46] and other  
42 northern European countries and most likely the majority of cases of diabetes  
43 diagnosed before 30 years are true type 1 diabetes. While this may not be applicable  
44  
45  
46  
47  
48  
49  
50  
51  
52  
53  
54  
55  
56  
57  
58  
59  
60

1  
2  
3 for offspring born to parents from other parts of the world with known high prevalence  
4  
5 of type 2 diabetes which may have led to overestimation of the true type 1 diabetes.  
6

7  
8 Our findings of a lower IRR of type 1 diabetes among children and young adults with  
9  
10 one or two foreign born parents, with the notable exception of offspring of African  
11  
12 immigrants, and the shifting of age at diagnosis towards younger age in both  
13  
14 offspring of Swedes and of immigrants highlight the important role of environmental  
15  
16 factors and its interaction with genetic background in the etiology of type 1 diabetes.  
17

18 In order to further clarify potential pathophysiological mechanisms for the  
19  
20 development of type1 diabetes, further studies are needed with data on important  
21  
22 exposures such as viral infections in early life, nutritional habits and weight gain in  
23  
24 infancy. Moreover, studies on offspring of immigrants from African countries, in  
25  
26 particular from Eastern Africa, might improve our understanding on the etiology of the  
27  
28 disease.  
29  
30  
31  
32  
33  
34  
35  
36  
37  
38  
39  
40  
41  
42  
43  
44  
45  
46  
47  
48  
49  
50  
51  
52  
53  
54  
55  
56  
57  
58  
59  
60

## Acknowledgements

This work was supported by grants from The Ministry of Higher Education and Scientific Research-Kurdistan Regional Government/Iraq, and the Department of Environmental Medicine, Karolinska institutet, Stockholm, Sweden.

The authors thank Professor Sven Cnattingius, for his critical review of the manuscript.

The authors appreciate the help from Statistics Sweden and the National Board of Health and Welfare, which provided them with data

## Competing interests

No potential conflicts of interest relevant to this article were reported.

## Contributors

H.I.H. designed the research, drafted the manuscript, analyzed data, and interpreted results.

M.P. designed the research, interpreted the results critically reviewed and edited the manuscript.

T.M. designed the research, interpreted the results, critically reviewed and edited the manuscript, handled research data and funding, and supervised.

## REFERENCES

1. Dabelea, D., *The accelerating epidemic of childhood diabetes*. Lancet, 2009. **373**(9680): p. 1999-2000.
2. Berhan, Y., et al., *Thirty years of prospective nationwide incidence of childhood type 1 diabetes: the accelerating increase by time tends to level off in Sweden*. Diabetes, 2011. **60**(2): p. 577-81.
3. Kondrashova, A., et al., *A six-fold gradient in the incidence of type 1 diabetes at the eastern border of Finland*. Ann Med, 2005. **37**(1): p. 67-72.
4. Pitkaniemi, J., et al., *Increasing incidence of Type 1 diabetes--role for genes?* BMC Genet, 2004. **5**: p. 5.
5. Hyttinen, V., et al., *Genetic liability of type 1 diabetes and the onset age among 22,650 young Finnish twin pairs: a nationwide follow-up study*. Diabetes, 2003. **52**(4): p. 1052-5.
6. Pundziute-Lycka, A., et al., *The incidence of Type I diabetes has not increased but shifted to a younger age at diagnosis in the 0-34 years group in Sweden 1983-1998*. Diabetologia, 2002. **45**(6): p. 783-91.
7. Weets, I., et al., *The incidence of type 1 diabetes in the age group 0-39 years has not increased in Antwerp (Belgium) between 1989 and 2000: evidence for earlier disease manifestation*. Diabetes Care, 2002. **25**(5): p. 840-6.
8. Hussen, H.I., et al., *Type I diabetes among children and young adults: the role of country of birth, socioeconomic position and sex*. Pediatr Diabetes, 2012.
9. Karvonen, M., et al., *Sex difference in the incidence of insulin-dependent diabetes mellitus: an analysis of the recent epidemiological data*. World Health Organization DIAMOND Project Group. Diabetes Metab Rev, 1997. **13**(4): p. 275-91.
10. Ostman, J., et al., *Gender differences and temporal variation in the incidence of type 1 diabetes: results of 8012 cases in the nationwide Diabetes Incidence Study in Sweden 1983-2002*. J Intern Med, 2008. **263**(4): p. 386-94.
11. Beiki, O., B. Stegmayr, and T. Moradi, *Country reports: Sweden*, in *Migration-sensitive Cancer Registration in Europe* O. Razum, et al., Editors. 2011, Lang p. 106-123.
12. Ludvigsson, J.F., et al., *The Swedish personal identity number: possibilities and pitfalls in healthcare and medical research*. Eur J Epidemiol, 2009. **24**(11): p. 659-67.
13. Johannesson, I., *The total population register of statistics Sweden. New possibilities and better quality*. Statistics Sweden: Örebro. 2002.
14. Socialstyrelsen, *Causes of death, The National Board of Health and Welfare, CENTRE FOR EPIDEMIOLOGY*. Official Statistics of Sweden, 2007.
15. Ludvigsson, J.F., et al., *External review and validation of the Swedish national inpatient register*. BMC Public Health, 2011. **11**: p. 450.
16. Socialstyrelsen. *Kvalitet och innehåll i patientregistret*. 2009 [cited 2010 08-05]; Available from: [www.socialstyrelsen.se](http://www.socialstyrelsen.se), The National Board of Health and Welfare.
17. *The Multi-Generation Registry. Bakgrundsfakta till befolknings-och välfärdstatistik*. Statistiska Centralbyrån: Örebro; 2001.
18. Statistics\_Sweden. *Folk- och bostadsräkningar, FoB*. 2010 [cited 2010 02-25]; Available from: [www.scb.se](http://www.scb.se).
19. Socialstyrelsen. *Longitudinal integration database for health insurance and labour market studies (LISA by Swedish acronym)*. 2010 [cited 2010 08-10]; Available from: [www.socialstyrelsen.se](http://www.socialstyrelsen.se).
20. Omar B. Ahmad, C.B.-P., Alan D. Lopez, Christopher JL Murray, Rafael Lozano, Mie Inoue, *AGE STANDARDIZATION OF RATES: A NEW WHO STANDARD*. GPE Discussion Paper Series: No.31, EIP/GPE/EBD, World Health Organization 2001.
21. *Statistical Research and Applications Branch NCI. Joinpoint regression program*. 2008. **Version 3.3.1**.

- 1
  - 2
  - 3
  - 4
  - 5
  - 6
  - 7
  - 8
  - 9
  - 10
  - 11
  - 12
  - 13
  - 14
  - 15
  - 16
  - 17
  - 18
  - 19
  - 20
  - 21
  - 22
  - 23
  - 24
  - 25
  - 26
  - 27
  - 28
  - 29
  - 30
  - 31
  - 32
  - 33
  - 34
  - 35
  - 36
  - 37
  - 38
  - 39
  - 40
  - 41
  - 42
  - 43
  - 44
  - 45
  - 46
  - 47
  - 48
  - 49
  - 50
  - 51
  - 52
  - 53
  - 54
  - 55
  - 56
  - 57
  - 58
  - 59
  - 60
22. Kim, H.J., et al., *Permutation tests for joinpoint regression with applications to cancer rates*. Stat Med, 2000. **19**(3): p. 335-51.
23. Green, A. and C.C. Patterson, *Trends in the incidence of childhood-onset diabetes in Europe 1989-1998*. Diabetologia, 2001. **44 Suppl 3**: p. B3-8.
24. *Incidence and trends of childhood Type 1 diabetes worldwide 1990-1999*. Diabetic Medicine, 2006. **23**(8): p. 857-866.
25. Dahlquist, G., *Can we slow the rising incidence of childhood-onset autoimmune diabetes? The overload hypothesis*. Diabetologia, 2006. **49**(1): p. 20-4.
26. Haynes, A., et al., *Perinatal risk factors for childhood Type 1 diabetes in Western Australia--a population-based study (1980-2002)*. Diabet Med, 2007. **24**(5): p. 564-70.
27. Dahlquist, G.G., C. Patterson, and G. Soltesz, *Perinatal risk factors for childhood type 1 diabetes in Europe. The EURODIAB Substudy 2 Study Group*. Diabetes Care, 1999. **22**(10): p. 1698-702.
28. Dahlquist, G.G., L. Nystrom, and C.C. Patterson, *Incidence of type 1 diabetes in Sweden among individuals aged 0-34 years, 1983-2007: an analysis of time trends*. Diabetes Care, 2011. **34**(8): p. 1754-9.
29. Hjern, A., U. Soderstrom, and J. Aman, *East Africans in Sweden have a high risk for type 1 diabetes*. Diabetes Care, 2012. **35**(3): p. 597-8.
30. Karvonen, M., et al., *Incidence of childhood type 1 diabetes worldwide. Diabetes Mondiale (DiaMond) Project Group*. Diabetes Care, 2000. **23**(10): p. 1516-26.
31. Hall, V., et al., *Diabetes in Sub Saharan Africa 1999-2011: epidemiology and public health implications. A systematic review*. BMC Public Health, 2011. **11**: p. 564.
32. <http://www.idf.org/diabetesatlas/5e/africa>.
33. Majaliwa, E.S., et al., *Type 1 diabetes mellitus in the African population: epidemiology and management challenges*. Acta Biomed, 2008. **79**(3): p. 255-9.
34. Monabeka, H.G., A. Mbika-Cardorelle, and G. Moyen, *[Ketoacidosis in children and teenagers in Congo]*. Sante, 2003. **13**(3): p. 139-41.
35. Rwiza, H.T., A.B. Swai, and D.G. McLarty, *Failure to diagnose diabetic ketoacidosis in Tanzania*. Diabet Med, 1986. **3**(2): p. 181-3.
36. Hjern, A. and U. Soderstrom, *Parental country of birth is a major determinant of childhood type 1 diabetes in Sweden*. Pediatr Diabetes, 2008. **9**(1): p. 35-9.
37. Cataldo, F., *Early onset of Type 1 diabetes mellitus in immigrant children from developing countries to Western Europe: the role of environmental factors?* J Endocrinol Invest, 2005. **28**(6): p. 574-5.
38. Soderstrom, U., J. Aman, and A. Hjern, *Being born in Sweden increases the risk for type 1 diabetes - a study of migration of children to Sweden as a natural experiment*. Acta Paediatr, 2012. **101**(1): p. 73-7.
39. Podar, T., et al., *Risk of childhood type 1 diabetes for Russians in Estonia and Siberia*. Int J Epidemiol, 1993. **22**(2): p. 262-7.
40. Patrick, S.L., et al., *IDDM incidence in a multiracial population. The Hawaii IDDM Registry, 1980-1990*. Diabetes Care, 1997. **20**(6): p. 983-7.
41. Ji, J., et al., *Ethnic differences in incidence of type 1 diabetes among second-generation immigrants and adoptees from abroad*. J Clin Endocrinol Metab, 2010. **95**(2): p. 847-50.
42. Muntoni, S., et al., *Incidence of insulin-dependent diabetes mellitus among Sardinian-heritage children born in Lazio region, Italy*. Lancet, 1997. **349**(9046): p. 160-2.
43. Neu, A., et al., *Diabetes incidence in children of different nationalities: an epidemiological approach to the pathogenesis of diabetes*. Diabetologia, 2001. **44 Suppl 3**: p. B21-6.
44. Zung, A., et al., *Type 1 diabetes in Jewish Ethiopian immigrants in Israel: HLA class II immunogenetics and contribution of new environment*. Hum Immunol, 2004. **65**(12): p. 1463-8.
45. Arnqvist, H.J., et al., *Difficulties in classifying diabetes at presentation in the young adult*. Diabet Med, 1993. **10**(7): p. 606-13.

1  
2  
3  
4  
5  
6  
7  
8  
9  
10  
11  
12  
13  
14  
15  
16  
17  
18  
19  
20  
21  
22  
23  
24  
25  
26  
27  
28  
29  
30  
31  
32  
33  
34  
35  
36  
37  
38  
39  
40  
41  
42  
43  
44  
45  
46  
47  
48  
49  
50  
51  
52  
53  
54  
55  
56  
57  
58  
59  
60

46. Lynch, K.F., et al., *Context and disease when disease risk is low: the case of type 1 diabetes in Sweden*. J Epidemiol Community Health, 2010. **64**(9): p. 789-95.

For peer review only



Figures

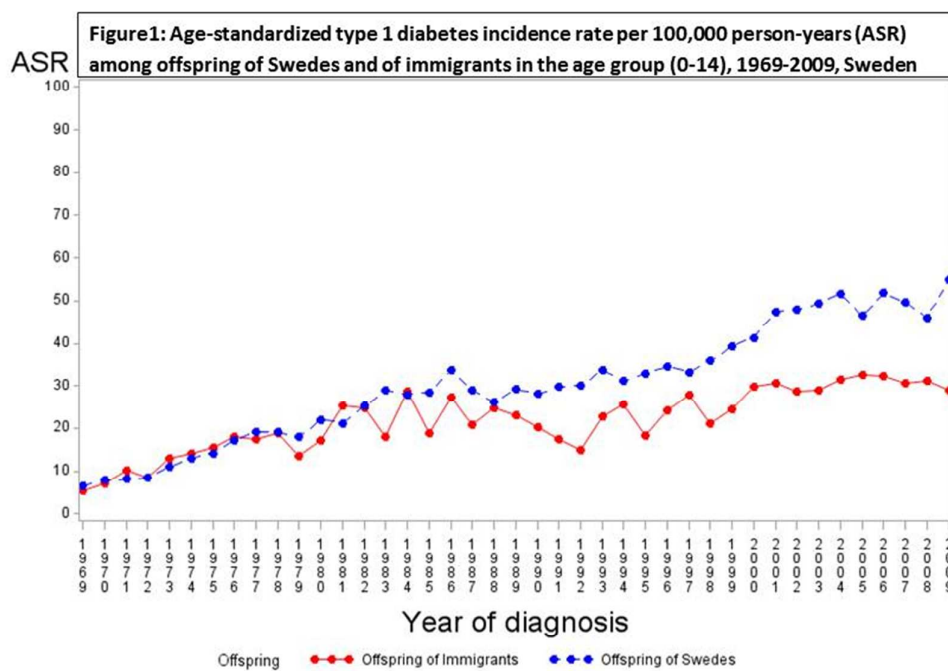

view only

1  
2  
3  
4  
5  
6  
7  
8  
9  
10  
11  
12  
13  
14  
15  
16  
17  
18  
19  
20  
21  
22  
23  
24  
25  
26  
27  
28  
29  
30  
31  
32  
33  
34  
35  
36  
37  
38  
39  
40  
41  
42  
43  
44  
45  
46  
47  
48  
49  
50  
51  
52  
53  
54  
55  
56  
57  
58  
59  
60

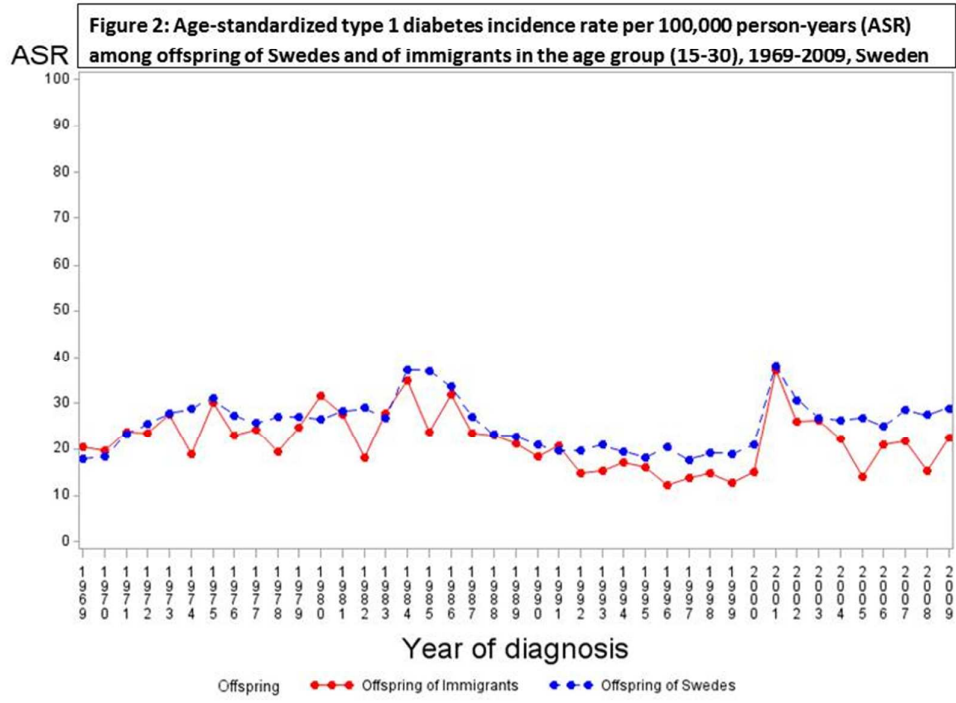

review only

Figure 3.A. : Incidence of type 1 diabetes by age at diagnosis (0-30 years) and birth cohorts 1960-2009 among offspring of Swedes in Sweden

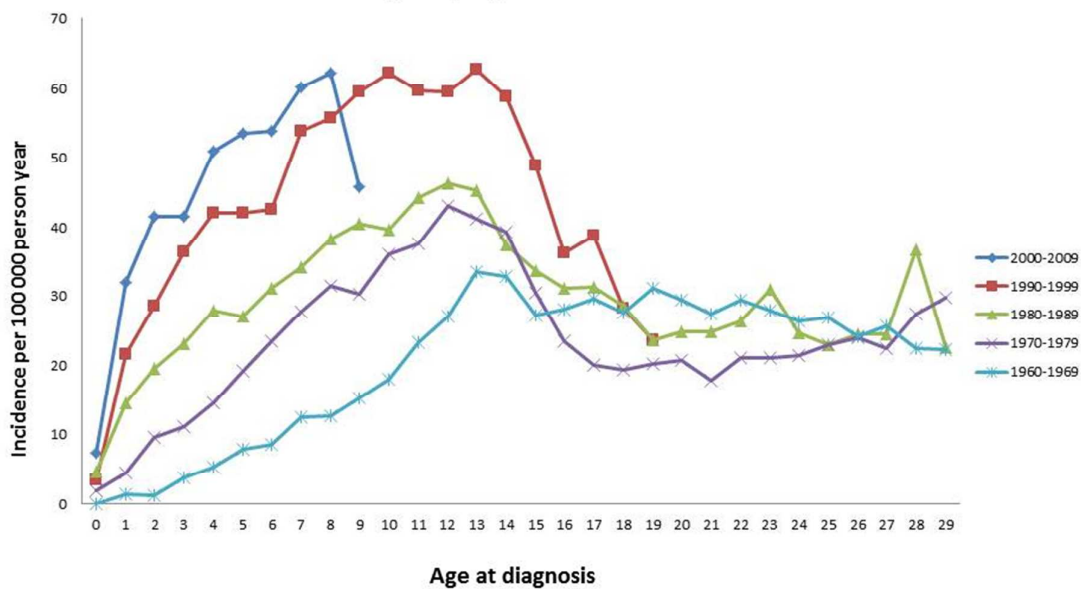

Review only

1  
2  
3  
4  
5  
6  
7  
8  
9  
10  
11  
12  
13  
14  
15  
16  
17  
18  
19  
20  
21  
22  
23  
24  
25  
26  
27  
28  
29  
30  
31  
32  
33  
34  
35  
36  
37  
38  
39  
40  
41  
42  
43  
44  
45  
46  
47  
48  
49  
50  
51  
52  
53  
54  
55  
56  
57  
58  
59  
60

Figure 3.B: Incidence of type 1 diabetes by age at diagnosis (0-30 years) and birth cohorts 1960-2009 among offspring of Immigrants in Sweden

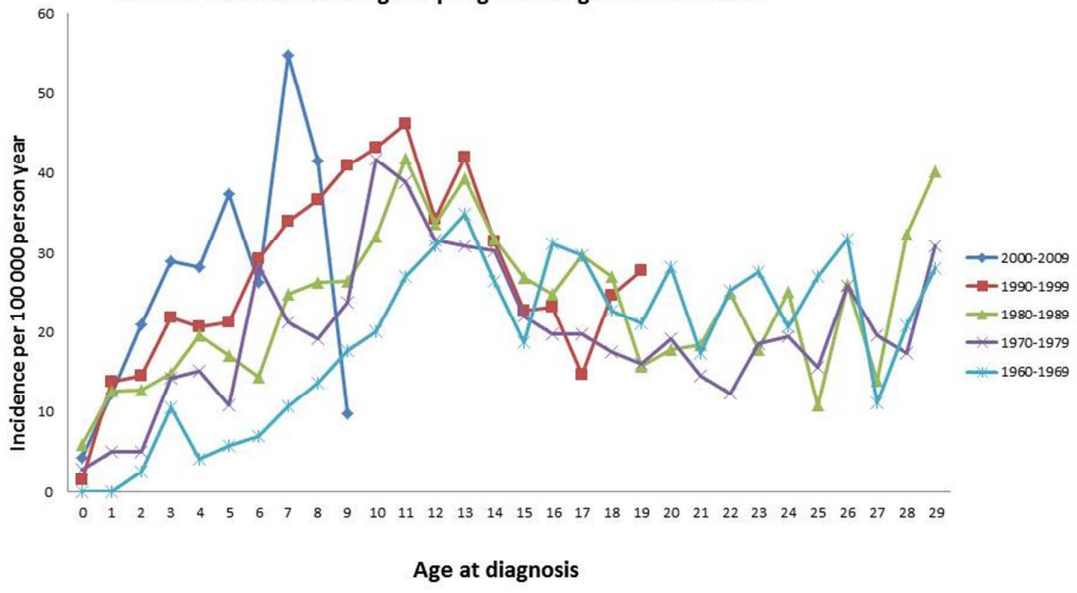

review only

**Table 1: Incidence rate ratio (IRR) and 95% confidence interval (CI) of type 1 diabetes among children aged (0-14) and young adults aged (15-30) by sex and parental country of birth, Sweden, 1969–2009.**

| Male (0-14)                 |       |          |                  |                  | Female (0-14)  |          |                  |                  |
|-----------------------------|-------|----------|------------------|------------------|----------------|----------|------------------|------------------|
| Parental immigration Status | Cases | PYRs     | IRR* (95% CI)    | IRR† (95% CI)    | Cases          | PYRs     | IRR* (95% CI)    | IRR† (95% CI)    |
| Mother foreign born         | 871   | 3810384  | 0.76 (0.71-0.81) | 0.69 (0.64-0.74) | 808            | 3610118  | 0.79 (0.73-0.85) | 0.71 (0.66-0.77) |
| Father foreign born         | 858   | 3948653  | 0.72 (0.67-0.77) | 0.65 (0.61-0.70) | 833            | 3764091  | 0.78 (0.73-0.84) | 0.70 (0.65-0.75) |
| Both parents foreign born   | 443   | 2249700  | 0.66 (0.60-0.73) | 0.58 (0.52-0.64) | 435            | 2134846  | 0.73 (0.66-0.80) | 0.62 (0.56-0.69) |
| Both parents born in Sweden | 8334  | 26670322 | 1                | 1                | 7417           | 25249558 | 1                | 1                |
| Male (15-30)                |       |          |                  |                  | Female (15-30) |          |                  |                  |
| Mother foreign born         | 624   | 2791560  | 0.82 (0.75-0.89) | 0.79 (0.73-0.86) | 510            | 2635294  | 0.82 (0.75-0.90) | 0.85 (0.77-0.93) |
| Father foreign born         | 618   | 2636310  | 0.86 (0.79-0.93) | 0.83 (0.76-0.90) | 442            | 2504279  | 0.75 (0.68-0.82) | 0.79 (0.72-0.87) |
| Both parents foreign born   | 270   | 1287893  | 0.76 (0.68-0.86) | 0.72 (0.64-0.82) | 204            | 1215563  | 0.71 (0.62-0.81) | 0.75 (0.65-0.86) |
| Both parents born in Sweden | 8024  | 29689985 | 1                | 1                | 6627           | 28192526 | 1                | 1                |

\* Adjusted for age in five years categories.  
† Mutually adjusted for age, parental education and calendar years of follow-up.

**Table 2: Incidence rate ratio (IRR) and 95% confidence interval (CI) of type 1 diabetes among male and female ages 0-30 years by parental country of birth and sex Sweden, 1969-2009.**

| Parental country of birth    | IRR* (95 % CI) |                         |       |                         |       |                           |        |                         |       |                         |       |                           |
|------------------------------|----------------|-------------------------|-------|-------------------------|-------|---------------------------|--------|-------------------------|-------|-------------------------|-------|---------------------------|
|                              | Male           |                         |       |                         |       |                           | Female |                         |       |                         |       |                           |
|                              | cases          | Offspring of Mother     | cases | Offspring of Father     | Cases | Offspring of both Parents | cases  | Offspring of Mother     | cases | Offspring of Father     | Cases | Offspring of both Parents |
| Sweden                       | 16358          | 1                       | 16358 | 1                       | 16358 | 1                         | 14044  | 1                       | 14044 | 1                       | 14044 | 1                         |
| Africa                       | 92             | <b>1.42 (1.15-1.75)</b> | 148   | <b>1.19 (1.01-1.41)</b> | 78    | 1.12 (0.90-1.41)          | 86     | <b>1.33 (1.10-1.65)</b> | 129   | <b>1.33 (1.12-1.59)</b> | 75    | <b>1.32 (1.05-1.66)</b>   |
| Northern Africa              | 21             | 1.18 (0.77-1.81)        | 55    | 1.06 (0.81-1.40)        | 16    | 0.86 (0.53- 1.40)         | 26     | 1.27 (0.86-1.86)        | 50    | 1.18 (0.89-1.55)        | 19    | 1.25 (0.80- 1.96)         |
| Western Africa               | 4              | -                       | 17    | 0.89 (0.55-1.42)        | 2     | -                         | 5      | 0.76 (0.32-1.83)        | 12    | 0.99 (0.56-1.74)        | 4     | -                         |
| Eastern Africa               | 66             | <b>1.51 (1.18-1.92)</b> | 70    | <b>1.46 (1.15-1.85)</b> | 58    | <b>1.45 (1.12-1.88)</b>   | 51     | <b>1.47 (1.11-1.93)</b> | 62    | <b>1.61 (1.25-2.10)</b> | 47    | <b>1.44 (1.08-1.92)</b>   |
| Asia                         | 133            | <b>0.37 (0.31-0.44)</b> | 155   | <b>0.40 (0.34-0.47)</b> | 107   | <b>0.36 (0.30-0.44)</b>   | 137    | <b>0.48 (0.40-0.56)</b> | 155   | <b>0.49 (0.42-0.57)</b> | 108   | <b>0.45 (0.37-0.54)</b>   |
| Europe                       |                |                         |       |                         |       |                           |        |                         |       |                         |       |                           |
| Finland                      | 692            | 0.98 (0.91-1.10)        | 523   | 0.99 (0.90-1.08)        | 273   | 0.96 (0.85-1.08)          | 587    | 0.96 (0.89-1.05)        | 442   | 0.97 (0.88-1.06)        | 232   | 0.93 (0.82-1.06)          |
| North Europe (excl. Finland) | 240            | 0.88 (0.77-1.00)        | 258   | 0.89 (0.78-1.00)        | 46    | 0.89 (0.67-1.19)          | 235    | 0.99 (0.87-1.12)        | 231   | 0.91 (0.80-1.04)        | 38    | 0.82 (0.60-1.13)          |
| S.E.W. Europe†               | 284            | <b>0.55 (0.49-0.62)</b> | 319   | <b>0.53 (0.47-0.59)</b> | 110   | <b>0.39 (0.33-0.47)</b>   | 227    | <b>0.53 (0.46-0.60)</b> | 264   | <b>0.52 (0.46-0.58)</b> | 95    | <b>0.41 (0.33-0.50)</b>   |
| Latin America                | 39             | <b>0.56 (0.41-0.77)</b> | 51    | <b>0.65 (0.49-0.87)</b> | 17    | <b>0.39 (0.24-0.63)</b>   | 29     | <b>0.51 (0.35-0.75)</b> | 23    | <b>0.33 (0.21-0.51)</b> | 14    | <b>0.41 (0.24-0.69)</b>   |
| North America                | 13             | <b>0.50 (0.29-0.86)</b> | 20    | <b>0.55 (0.36-0.86)</b> | 0     | -                         | 15     | 0.78 (0.47-1.30)        | 31    | 1.02 (0.72-1.46)        | 0     | -                         |
| Oceania                      | 2              | -                       | 2     | -                       | 0     | -                         | 2      | -                       | 0     | -                       | 0     | -                         |
| Mixed‡                       | 0              | -                       | 0     | -                       | 84    | <b>0.64 (0.52-0.79)</b>   | 0      | -                       | 0     | -                       | 82    | <b>0.75 (0.61-0.94)</b>   |

\* Adjusted for age, parental education and calendar years of follow-up.

† South, East and West Europe

‡ Both parents are not from the same country or region.

IRR significantly different from 1 are bolded.

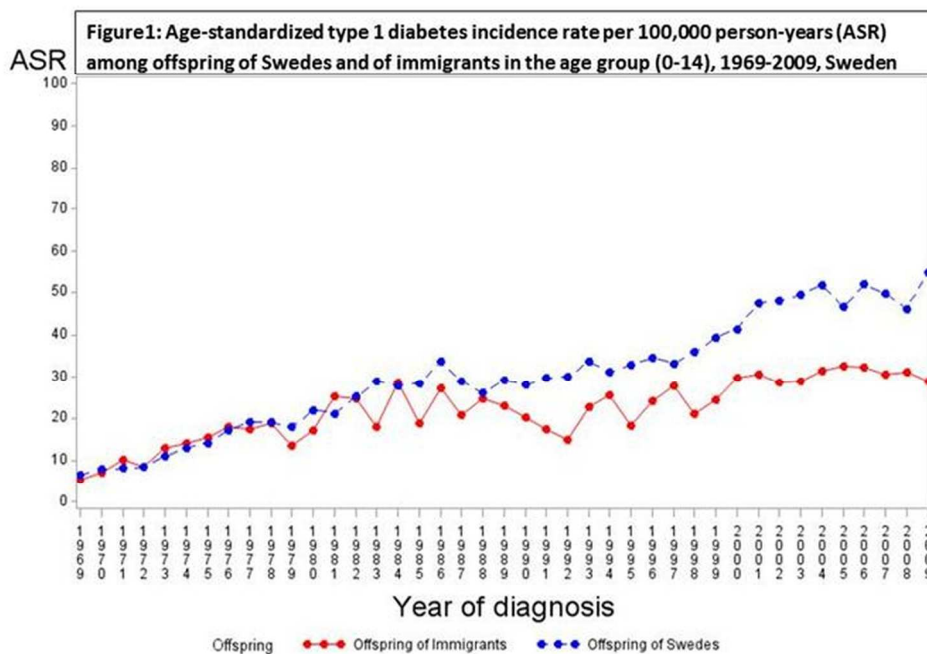

126x90mm (300 x 300 DPI)

view only

1  
2  
3  
4  
5  
6  
7  
8  
9  
10  
11  
12  
13  
14  
15  
16  
17  
18  
19  
20  
21  
22  
23  
24  
25  
26  
27  
28  
29  
30  
31  
32  
33  
34  
35  
36  
37  
38  
39  
40  
41  
42  
43  
44  
45  
46  
47  
48  
49  
50  
51  
52  
53  
54  
55  
56  
57  
58  
59  
60

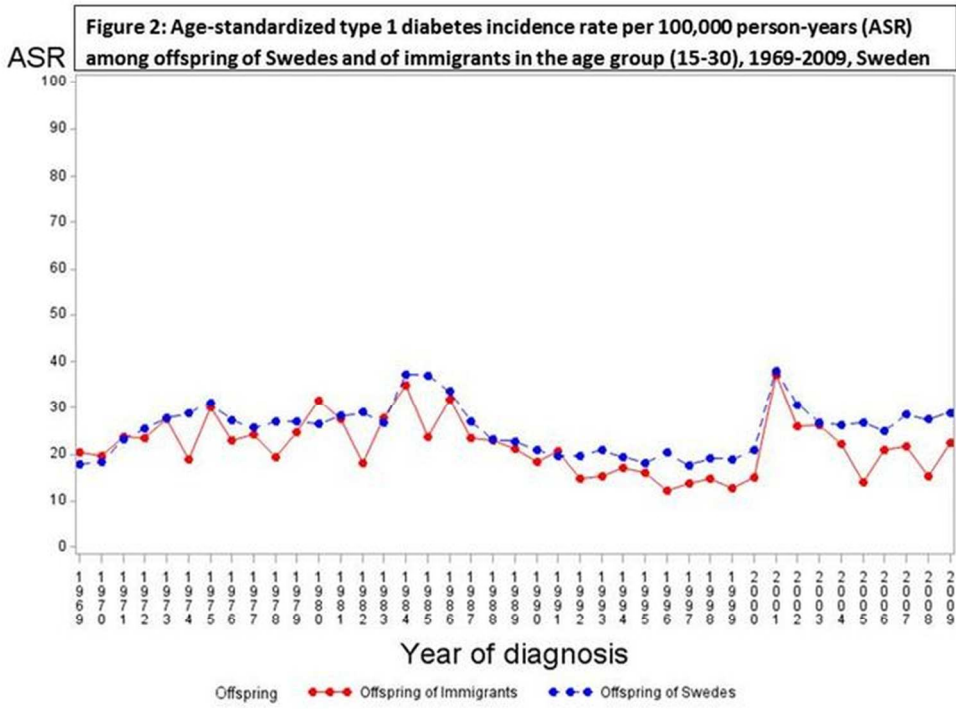

119x90mm (300 x 300 DPI)

View only



Figure 3.A. : Incidence of type 1 diabetes by age at diagnosis (0-30 years) and birth cohorts 1960-2009 among offspring of Swedes in Sweden

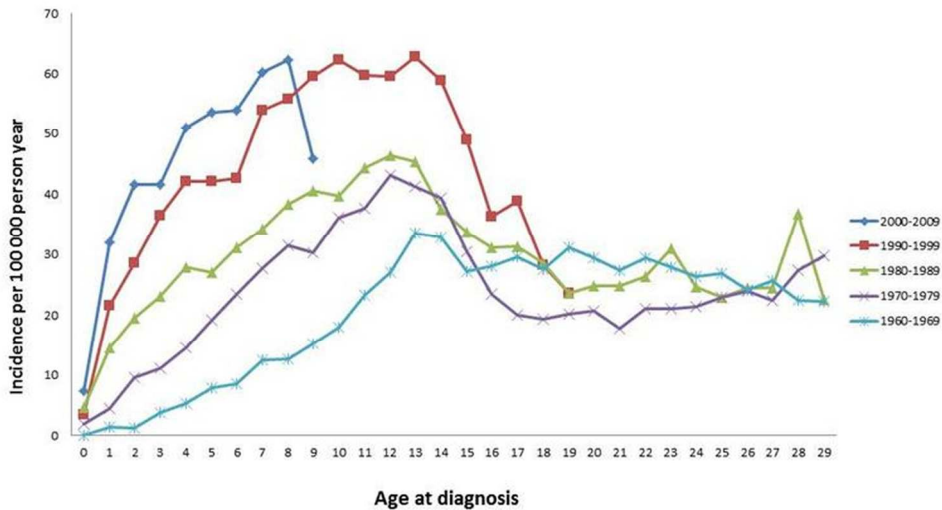

142x90mm (300 x 300 DPI)

review only

1  
2  
3  
4  
5  
6  
7  
8  
9  
10  
11  
12  
13  
14  
15  
16  
17  
18  
19  
20  
21  
22  
23  
24  
25  
26  
27  
28  
29  
30  
31  
32  
33  
34  
35  
36  
37  
38  
39  
40  
41  
42  
43  
44  
45  
46  
47  
48  
49  
50  
51  
52  
53  
54  
55  
56  
57  
58  
59  
60

Figure 3.B: Incidence of type 1 diabetes by age at diagnosis (0-30 years) and birth cohorts 1960-2009 among offspring of Immigrants in Sweden

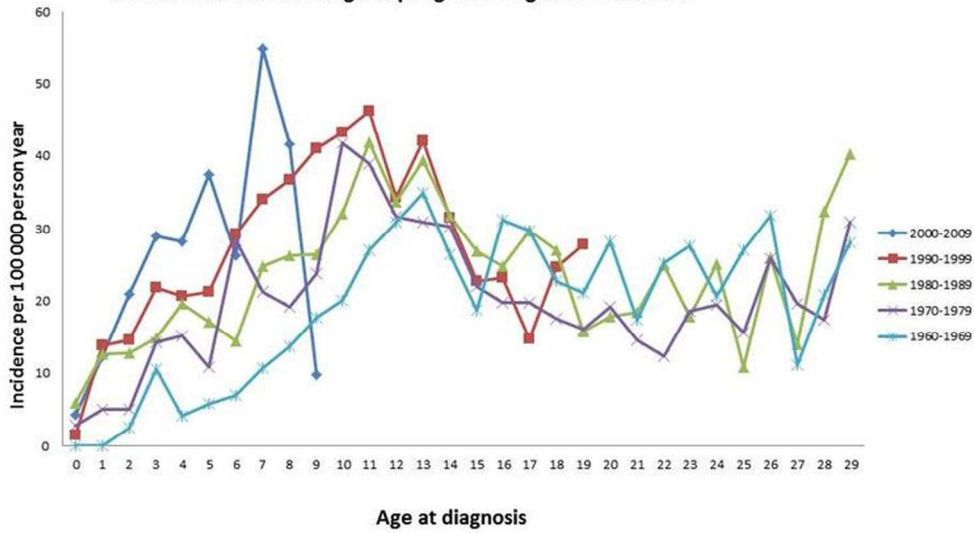

149x90mm (300 x 300 DPI)

Review only
