# Supplementary material for: The trends and the risk of type 1 diabetes over the past 40 years: an analysis by birth cohorts and by parental migration background in Sweden
Source: HighWire-hosted journal article supplement (doi:10.1136/bmjopen-2013-003418), 2013-10-01
Supplement: bmjopen-2013-003418supp_tables.pdf [file bmjopen-2013-003418supp_tables.pdf]

## Supplementary tables

**Table 1S: Incidence rate ratio (IRR) and 95% confidence interval (CI) of type 1 diabetes among children aged (0-13) by sex and parental country of birth, Sweden, 1997–2009.**

| Parental migration Status   | Male (0-13) |         |                  |                  | Female (0-13) |         |                  |                  |
|-----------------------------|-------------|---------|------------------|------------------|---------------|---------|------------------|------------------|
|                             | Cases       | PYRs    | IRR* (95% CI)    | IRR† (95% CI)    | Cases         | PYRs    | IRR* (95% CI)    | IRR† (95% CI)    |
| Mother foreign born         | 388         | 1291769 | 0.57 (0.52-0.64) | 0.58 (0.52-0.64) | 371           | 1225944 | 0.60 (0.54-0.66) | 0.59 (0.53-0.66) |
| Father foreign born         | 413         | 1348032 | 0.58 (0.53-0.65) | 0.59 (0.53-0.65) | 392           | 1285912 | 0.60(0.54-0.66)  | 0.60 (0.54-0.66) |
| Both parents foreign born   | 221         | 869641  | 0.49 (0.43-0.56) | 0.50 (0.43-0.57) | 223           | 826716  | 0.54 (0.47-0.61) | 0.53 (0.46-0.61) |
| Both parents born in Sweden | 3710        | 6742640 | 1                | 1                | 3427          | 6380947 | 1                | 1                |

\* Adjusted for age in four years categories.

† Mutually adjusted for age, parental education and calendar years of follow-up.

**Table 2Sa: Incidence rate ratio (IRR) and 95% confidence interval (CI) of type 1 diabetes among male and female ages 0-13 years by parental country of birth and sex, Sweden, 1997-2009.**

| Parental country of birth    | IRR* (95 % CI) |                         |       |                         |       |                           |        |                         |       |                         |       |                           |
|------------------------------|----------------|-------------------------|-------|-------------------------|-------|---------------------------|--------|-------------------------|-------|-------------------------|-------|---------------------------|
|                              | Male           |                         |       |                         |       |                           | Female |                         |       |                         |       |                           |
|                              | cases          | Offspring of Mother     | cases | Offspring of Father     | Cases | Offspring of both Parents | cases  | Offspring of Mother     | cases | Offspring of Father     | Cases | Offspring of both Parents |
| Sweden                       | 3710           | 1                       | 3710  | 1                       | 3710  | 1                         | 3427   | 1                       | 3427  | 1                       | 3427  | 1                         |
| Africa                       | 70             | <b>1.27 (1.00-1.61)</b> | 92    | <b>1.23 (1.00-1.51)</b> | 64    | 1.10 (0.86-1.41)          | 63     | 1.12 (0.87-1.44)        | 81    | 1.19 (0.95-1.48)        | 58    | 1.07 (0.82-1.39)          |
| Northern Africa              | 15             | 1.32 (0.79-2.19)        | 25    | 1.04 (0.70-1.54)        | 12    | 1.07 (0.61-1.89)          | 19     | 1.52 (0.97-2.39)        | 26    | 1.40 (0.95-2.05)        | 13    | 1.27 (0.74-2.20)          |
| Western Africa               | 2              | -                       | 8     | 1.05 (0.53-2.11)        | 2     | -                         | 3      | -                       | 4     | -                       | 3     | -                         |
| Eastern Africa               | 53             | 1.29 (0.98-1.69)        | 57    | <b>1.32 (1.02-1.72)</b> | 49    | 1.26 (0.95-1.68)          | 39     | 1.02 (0.74-1.40)        | 47    | 1.18 (0.89-1.58)        | 38    | 1.04 (0.76-1.44)          |
| Asia                         | 95             | <b>0.41 (0.33-0.50)</b> | 102   | <b>0.43 (0.35-0.52)</b> | 79    | <b>0.39 (0.31-0.49)</b>   | 86     | <b>0.40 (0.32-0.50)</b> | 94    | <b>0.43 (0.35-0.52)</b> | 68    | <b>0.35 (0.28-0.45)</b>   |
| Europé                       |                |                         |       |                         |       |                           |        |                         |       |                         |       |                           |
| Finland                      | 87             | 1.05 (0.85-1.30)        | 79    | 1.09 (0.87-1.36)        | 20    | 1.27 (0.82-1.97)          | 83     | 1.07 (0.86-1.33)        | 68    | 0.99 (0.77-1.25)        | 17    | 1.15 (0.71-1.85)          |
| North Europe (excl. Finland) | 37             | 0.89 (0.65-1.24)        | 45    | 0.86 (0.64-1.16)        | 3     | -                         | 34     | 0.88 (0.63-1.23)        | 41    | 0.86 (0.63-1.17)        | 2     | -                         |
| S.E.W. Europe†               | 73             | <b>0.47 (0.37-0.59)</b> | 69    | <b>0.42 (0.33-0.54)</b> | 23    | <b>0.23 (0.15-0.35)</b>   | 80     | <b>0.56 (0.45-0.70)</b> | 86    | <b>0.56 (0.45-0.69)</b> | 46    | <b>0.49 (0.37-0.66)</b>   |
| Latin America                | 23             | <b>0.63 (0.42-0.95)</b> | 20    | <b>0.62 (0.40-0.96)</b> | 6     | <b>0.28 (0.13-0.62)</b>   | 19     | <b>0.58 (0.37-0.91)</b> | 11    | <b>0.33 (0.18-0.60)</b> | 8     | <b>0.41 (0.20-0.81)</b>   |
| North America                | 3              | -                       | 4     | -                       | 0     | -                         | 6      | 1.04 (0.47-2.32)        | 11    | 1.02 (0.57-1.85)        | 0     | -                         |
| Oceania                      | -              | -                       | 2     | -                       | 0     | -                         | 0      | -                       | 0     | -                       | 0     | -                         |
| Mixed‡                       |                |                         |       |                         | 17    | <b>0.47 (0.29-0.76)</b>   |        |                         |       |                         | 17    | <b>0.51 (0.32-0.82)</b>   |

\* Adjusted for age, parental education and calendar years of follow-up.

† South, East and West Europe

‡ Both parents are not from the same country or region.

IRRs significantly different from 1 are bolded.

**Table 2Sb: Incidence rate ratio (IRR) and 95% confidence interval (CI) of type 1 diabetes among male and female ages 0-13 years by parental country of birth and sex, Sweden, 1969-2009.**

| Parental country of birth    | IRR* (95 % CI) |                         |       |                         |       |                           |        |                         |       |                         |       |                           |
|------------------------------|----------------|-------------------------|-------|-------------------------|-------|---------------------------|--------|-------------------------|-------|-------------------------|-------|---------------------------|
|                              | Male           |                         |       |                         |       |                           | Female |                         |       |                         |       |                           |
|                              | cases          | Offspring of Mother     | cases | Offspring of Father     | Cases | Offspring of both Parents | cases  | Offspring of Mother     | cases | Offspring of Father     | Cases | Offspring of both Parents |
| Sweden                       | 6620           | 1                       | 6620  | 1                       | 6620  | 1                         | 6319   | 1                       | 6319  | 1                       | 6319  | 1                         |
| Africa                       | 76             | <b>1.34 (1.07-1.68)</b> | 111   | <b>1.24 (1.03-1.50)</b> | 68    | 1.12 (0.88-1.42)          | 70     | 1.16 (0.92-1.47)        | 96    | 1.15 (0.94-1.41)        | 62    | 1.08 (0.84-1.39)          |
| Northern Africa              | 15             | 1.12 (0.67-1.86)        | 36    | 1.07 (0.77-1.49)        | 12    | 0.88 (0.50-1.55)          | 21     | 1.38 (0.90-2.12)        | 34    | 1.09 (0.78-1.53)        | 14    | 1.08 (0.64-1.82)          |
| Western Africa               | 3              | -                       | 11    | 0.92 (0.51-1.66)        | 2     | -                         | 4      | -                       | 6     | 0.63 (0.28-1.40)        | 3     | -                         |
| Eastern Africa               | 58             | <b>1.42 (1.10-1.85)</b> | 62    | <b>1.42 (1.10-1.82)</b> | 52    | <b>1.36 (1.04-1.79)</b>   | 42     | 1.12 (0.82-1.51)        | 52    | 1.29 (0.98-1.70)        | 40    | 1.12 (0.82-1.52)          |
| Asia                         | 103            | <b>0.39 (0.32-0.48)</b> | 115   | <b>0.42 (0.35-0.50)</b> | 84    | <b>0.37 (0.30-0.46)</b>   | 98     | <b>0.38 (0.31-0.46)</b> | 113   | <b>0.43 (0.36-0.52)</b> | 77    | <b>0.35 (0.28-0.44)</b>   |
| Europe                       |                |                         |       |                         |       |                           |        |                         |       |                         |       |                           |
| Finland                      | 274            | 1.08 (0.95-1.22)        | 224   | 1.09 (0.95-1.25)        | 112   | 1.20 (0.99-1.45)          | 279    | 1.10 (0.98-1.25)        | 232   | 1.13 (0.99-1.28)        | 119   | <b>1.23 (1.03-1.48)</b>   |
| North Europe (excl. Finland) | 85             | 0.88 (0.71-1.09)        | 84    | 0.75 (0.61-0.93)        | 8     | 0.52 (0.26-1.05)          | 89     | 0.99 (0.80-1.22)        | 103   | 0.93 (0.76-1.13)        | 11    | 0.69 (0.38-1.25)          |
| S.E.W. Europe†               | 134            | <b>0.53 (0.44-0.63)</b> | 133   | <b>0.46 (0.38-0.54)</b> | 45    | <b>0.30 (0.22-0.40)</b>   | 130    | <b>0.53 (0.45-0.64)</b> | 146   | <b>0.52 (0.44-0.61)</b> | 59    | <b>0.41 (0.32-0.53)</b>   |
| Latin America                | 27             | <b>0.56 (0.39-0.82)</b> | 30    | <b>0.64 (0.45-0.92)</b> | 9     | <b>0.30 (0.16-0.58)</b>   | 23     | <b>0.52 (0.35-0.78)</b> | 15    | <b>0.30 (0.18-0.51)</b> | 11    | <b>0.40 (0.22-0.72)</b>   |
| North America                | 4              | -                       | 8     | <b>0.44 (0.22-0.88)</b> | 0     | -                         | 8      | 0.82 (0.41-1.65)        | 15    | 0.87 (0.52-1.44)        | 0     | -                         |
| Oceania                      | 1              | -                       | 2     | -                       | 0     | -                         | 1      | -                       | 0     | -                       | 0     | -                         |
| Mixed‡                       |                |                         |       |                         | 26    | <b>0.53 (0.36-0.78)</b>   |        |                         |       |                         | 23    | <b>0.49 (0.33-0.75)</b>   |

\* Adjusted for age, parental education and calendar years of follow-up.

† South, East and West Europe

‡ Both parents are not from the same country or region.

IRRs significantly different from 1 are bolded.
